1 **Microbial stowaways – waterbirds as dispersal vectors of aquatic pro- and**  
2 **microeukaryotic communities**

3 **Running title: Microbial dispersal by waterbirds**

4 Beáta Szabó<sup>1</sup>, Attila Szabó<sup>1,2</sup>, Csaba F. Vad<sup>1,3,4</sup>, Emil Boros<sup>1</sup>, Dunja Lukić<sup>3,5</sup>, Robert  
5 Ptacnik<sup>3</sup>, Zsuzsanna Márton<sup>1,3,6</sup>, Zsófia Horváth<sup>1,3,4</sup>

6 <sup>1</sup>Institute of Aquatic Ecology, Centre for Ecological Research, Budapest, Hungary

7 <sup>2</sup>Swedish University of Agricultural Sciences, Uppsala, Sweden

8 <sup>3</sup>WasserCluster Lunz - Biologische Station, Lunz am See, Austria

9 <sup>4</sup>Laboratory of Aquatic Ecology, Evolution and Conservation, KU Leuven, Leuven, Belgium

10 <sup>5</sup>Research Department for Limnology, University of Innsbruck, Mondsee, Austria

11 <sup>6</sup>Eötvös Loránd University, Budapest, Hungary

12 Correspondence

13 Beáta Szabó, Institute of Aquatic Ecology, Centre for Ecological Research, Budapest,  
14 Hungary

15 E-mail: schneiderbea@gmail.com

16

17 **Acknowledgements**

18 Authors thank the colleagues of Lake Neusiedl Biological Station, Thomas Zechmeister,  
19 Richard Haider and Rudolf Schalli, for their help in field work and providing access to their  
20 labs; colleagues of Fertő-Hanság and Neusiedler See - Seewinkel National Parks for  
21 providing and helping us access the sites as part of the Vogelwarte - Madárvárta 2 project;  
22 Christian Preiler for further practical help; Mia Bengtsson for her help with selecting the  
23 primers used in the study; Lucie Zinger and two anonymous reviewers whose comments  
24 helped to improve the manuscript. The study was supported by the Interreg V-A  
25 Austria-Hungary programme of the European Regional Development Fund (Vogelwarte  
26 Madárvárta 2). Field work was permitted through the Fertő-Hanság and Neusiedler See -  
27 Seewinkel National Parks as part of the project and additionally through the permits ND-10-  
28 05-4326-4-2017 (Neusiedl am See Bezirkshauptmannschaft) and PE-KTF/882-2/2018 (Pest  
29 Megyei Kormányhivatal Környezetvédelmi és Természetvédelmi Főosztály). BS  
30 acknowledges further support by NKFIH-132095. ZH and CFV were supported by GINOP  
31 2.3.2-15-2016-00057 and the AQUACOSM-plus project of the European Union's  
32 Horizon 2020 research and innovation programme under grant agreement No. 871081. ZH  
33 acknowledges support from the Janos Bolyai Research Scholarship of the Hungarian  
34 Academy of Sciences. AS was supported by the Wenner-Gren Foundations. BS, AS, CFV,  
35 ZM, and ZH were furthermore supported by the NKFIH-471-3/2021 project.

36

37 **Abstract**

38 **Aim:** Waterbirds are important dispersal vectors of multicellular organisms such as  
39 macrophytes, aquatic macroinvertebrates, and zooplankton. However, no study to date has  
40 focused on their potential role in dispersing aquatic microbial communities (i.a., bacteria,

1 algae, protozoa). Here, we explicitly studied passive transport (endozoochory) of prokaryotes  
2 and unicellular microeukaryotes by waterbirds based on DNA metabarcoding approaches. By  
3 directly comparing the dispersed set of organisms to the source pool of a natural  
4 metacommunity, we aimed for a realistic estimate of the overall importance of waterbird  
5 zoochory for natural microbial communities.

6 **Location:** Shallow saline temporary ponds (soda pans) in the cross-border region of Austria  
7 and Hungary.

8 **Taxon:** Prokaryotes and unicellular microeukaryotes.

9 **Methods:** In 2017 and 2018, water samples from 25 natural aquatic habitats along with fresh  
10 droppings of the dominant greylag goose (*Anser anser*) and four other waterbird species were  
11 collected in a habitat network of temporary ponds. Their prokaryotic and microeukaryotic  
12 communities were identified via 16S and 18S rRNA gene amplicon sequencing. Sequence  
13 reads were analysed using mothur. After quality filtering of the reads, pro- and  
14 microeukaryotic amplicon sequencing variant (ASV) compositions were compared between  
15 the aquatic and dropping samples, across years and waterbird species.

16 **Results:** We found that 28% of the dominant aquatic prokaryotic and 19% of the  
17 microeukaryotic ASVs were transported by *A. anser*. ASV richness in *A. anser* droppings was  
18 lower, but compositional variation was higher compared to the aquatic communities, probably  
19 resulting from stochastic pick-up of microbes from multiple aquatic habitats. We furthermore  
20 found that the composition of prokaryotic ASVs in bird droppings were different among the  
21 two years and reflected the actual aquatic communities. The dispersed set of microbes were  
22 largely similar among the different waterbird species except for the planktivore filter-feeder  
23 northern shoveler (*Spatula clypeata*) which was outstanding by dispersing a more species-rich  
24 subset of microeukaryotes than shorebirds or geese.

25 **Main conclusions:** By using a combined amplicon-sequencing approach to characterize  
26 microorganisms in waterbird droppings and in the associated environment, our study provides  
27 strong evidence for endozoochory of natural aquatic microorganism communities. These  
28 results imply that waterbirds may be crucial in maintaining ecological connectivity between  
29 discrete aquatic habitats at the level of microbial communities.

30 **Keywords:** aquatic microorganisms, bacteria, connectivity, dispersal, DNA metabarcoding,  
31 endozoochory, phytoplankton, protists

## 1 Introduction

2 Dispersal is a key process connecting habitats, thereby sustaining gene flow (Clobert et al.,  
3 2012), biodiversity (Leibold et al., 2004), and ecosystem functions (Bannar-Martin et al.,  
4 2018; Zobel et al., 2006). For a long time, prokaryotes, together with unicellular and small  
5 multicellular eukaryotes have been considered to have a cosmopolitan distribution and their  
6 communities were assumed to be driven only by local environmental and biotic factors (Baas-  
7 Becking, 1934; Beijerinck, 1913). However, recent studies (e.g. Cho & Tiedje, 2000; Martiny  
8 et al., 2006; Telford et al., 2006; Zinger et al., 2014) benefiting from the rapid development of  
9 community sequencing methods led to a paradigm shift by providing evidence for  
10 biogeographical patterns and increased recognition of the importance of spatial processes in  
11 microorganisms (Langenheder & Lindström, 2019; Mony et al., 2020; Ptacnik et al., 2010;  
12 van der Gast, 2015; Vyverman et al., 2007). This has finally placed microbes in the same  
13 metacommunity framework that has been already well-established for macroorganisms  
14 (Leibold & Chase, 2018).

15 Hence, the importance of passive dispersal for microorganisms is now acknowledged,  
16 which can occur by wind (Genitsaris et al., 2011; Sharma et al., 2007), water currents (Luef et  
17 al., 2007), animals (Figuerola & Green, 2002a; Green et al., 2008; Valls et al., 2017), and  
18 human activities (Reise et al., 1999; Ruiz et al., 2000). But despite the increasing interest in  
19 microbial dispersal and the availability of modern molecular techniques, zoochory is still  
20 largely neglected in this respect. Although there is evidence for waterbirds being effective  
21 short- and long-distance dispersal agents of macrophytes, macroinvertebrates, zooplankton  
22 and vertebrates (Brochet, Gauthier-Clerc, et al., 2010; Figuerola & Green, 2002b; Figuerola et  
23 al., 2003; Lovas-Kiss et al., 2019, 2020; Reynolds & Cumming, 2016; Silva et al., 2019;  
24 Viana et al., 2013a, 2013b), waterbird-mediated dispersal of unicellular microorganisms  
25 (especially bacteria) is poorly understood. There is evidence for the transport of viruses  
26 (Blagodatski et al., 2021) and microorganisms exemplified mainly by the dispersal of single  
27 and/or pathogenic microbial taxa (Briscoe et al., 2021; Garmyn et al., 2012; Hartikainen et al.,  
28 2016; Jarma et al., 2021; Lewis et al., 2014) or their co-dispersal with their infected hosts  
29 (Okamura et al., 2019). However, no explicit studies have so far targeted the dispersal  
30 potential of waterbirds for natural aquatic microbial communities with a direct comparison of  
31 natural communities to taxa dispersed by waterbirds.

32 Here, we carry out an extensive study on the role of waterbirds as dispersal agents of  
33 aquatic pro- and eukaryotic unicellular microorganisms with the help of high-throughput  
34 DNA sequencing. Our study area is a landscape of saline temporary ponds, representing a  
35 well-delineated habitat network. The characteristic species of the waterbird community in the  
36 area is greylag goose (*Anser anser*), with more than 6,000 individuals (Wendelin & Dvorak,  
37 2020). This species is known to be a regular large-bodied visitor of aquatic habitats, moving  
38 in flocks of up to 750 individuals (McKay et al., 2006). It has been suggested that they may  
39 contribute significantly to the transport of passively dispersing organisms across aquatic  
40 habitats (García-Álvarez et al., 2015; Green et al., 2002). However, we lack empirical data to  
41 assess their actual role as dispersal agents for microbial organisms.

42 In line with this, our main objective is to investigate the potential of zoochory by  
43 waterbirds for dispersing microorganisms among local habitats in a metacommunity.  
44 Specifically, our first aim is to reveal what proportion of the amplicon sequence variants  
45 (ASVs) occurring in the aquatic habitats can be found in droppings of the dominant waterbird  
46 of the region, *A. anser*. Here, we also investigate whether the microbial communities detected  
47 in the bird droppings reflect a possible change of the communities in the aquatic habitats over

1 time. And finally, we assess the dispersal potential of *A. anser* relative to three other  
2 waterbird species with different feeding habits and habitat use in the same landscape.

#### 4 **Material & methods**

##### 5 *Sampling and sample processing*

6 The study area (~ 200 km<sup>2</sup>, Horváth et al., 2016) in the cross-border region of Fertő /  
7 Neusiedlersee Cultural Landscape in Austria and Hungary is characterized by a dense cluster  
8 of temporary saline ponds (soda pans). These habitats form a habitat network relatively  
9 isolated from freshwater habitats or other soda pans in the central and eastern regions of  
10 Hungary (Tóth et al., 2014). The clumped nature of this pondscape, with shallow ( $\leq 1$  m) and  
11 hypertrophic aquatic habitats (Boros et al., 2017) offers excellent feeding grounds for  
12 invertivorous waterbirds (Horváth et al., 2013) and breeding sites for several other species,  
13 including greylag geese (*Anser anser*, Dvorak et al., 2020; Wendelin & Dvorak, 2020). The  
14 region is legally protected as part of two national parks (Neusiedlersee-Seewinkel in Austria,  
15 and Fertő-Hanság in Hungary), designated as Important Bird Area (BirdLife International,  
16 2021a, 2021b) and part of a UNESCO World Heritage site (Fertő / Neusiedlersee Cultural  
17 Landscape).

18 We collected water samples from 25 soda pans in two consecutive years (3-6 April  
19 2017 and 2-4 April 2018; Figure 1), representing all habitats that held water in both years  
20 (hereafter aquatic community samples). The sampled habitats are situated within 17 km  
21 (largest distance between two habitats), thereby representing a region where waterbirds can  
22 regularly move around on a daily basis (Bell, 1988, Boos et al., 2019; Link et al., 2011;  
23 Nilsson & Persson, 1992). From each soda pan, a total of 20 L of water was collected from 20  
24 different points using a one-litre plastic beaker (thus collecting a pooled sample from the  
25 largest possible area) and sieved through a 100- $\mu$ m mesh plankton net to remove large  
26 zooplankton and filamentous algae which would hinder the detection of unicellular organisms  
27 during amplicon sequencing. Sampling of water was carried out by wading so that we gently  
28 collected water from the undisturbed areas in front of us. For further processing, 1 L of the  
29 composite sieved water was immediately delivered to the laboratory in a glass bottle in a cool  
30 box. As many of the studied soda pans have high turbidity and high prokaryotic or algal cell  
31 numbers (10<sup>6</sup>-10<sup>8</sup> cells mL<sup>-1</sup>, Boros et al., 2017; Kirschner et al., 2002), for molecular  
32 analysis, 1-50 mL of water (depending on turbidity, as Secchi depth ranged from 0.3 to 44  
33 cm) was filtered through a nitrocellulose membrane filter ( $\varnothing$  47 mm) with a pore size of 0.22  
34  $\mu$ m until clogging. Thereafter, filters were stored at -20 °C until DNA extraction.

35 Simultaneously, we collected fresh waterbird droppings at all sites that hosted a  
36 monospecific flock of waterbirds. We approached the birds roosting on dry mudflats or  
37 grasslands on the shores or right next to the soda pans and once they took off, fresh droppings  
38 were collected in sterile cryogenic vials and immediately frozen on dry ice. Droppings at least  
39 one-metre apart were collected thereby ensuring an individual being sampled only once  
40 (Lovas-Kiss et al., 2018). To scrape off any soil or plant material and pick up the faecal  
41 sample we used the vial and its cap, in which the given sample was stored. This way we  
42 avoided the potential contamination due to long-term exposure to e.g. wind-dispersed  
43 propagules and also avoided possible cross-contamination with a shared sampling equipment.  
44 Bird droppings were stored at -20 °C until further processing. In 2017, a total of 64 droppings  
45 from *Anser anser*, *Calidris pugnax*, *Recurvirostra avosetta*, *Spatula clypeata*, while in 2018,  
46 altogether 70 droppings from *A. anser* and *A. albifrons* were collected with this method  
47 (Figure 1). The feeding mode of the waterbird species was summarized in Table S1.

1 We used the two datasets (aquatic communities and bird droppings) to compare the  
2 possible dispersal provided by waterbirds with the implicit limitation that we cannot  
3 differentiate between viable propagules and non-viable remnants of the original  
4 microorganisms. At the moment, there is no single culturing method that could have been  
5 applied for waterbird droppings without being extremely selective for the emerging microbes  
6 and hence we decided to sequence the samples as a whole (as in Hartikainen et al., 2016 and  
7 Jarma et al., 2021). Although this can mean an overestimate for the ratio of successfully  
8 dispersed taxa, it can still provide a critical first estimate of what might be transported by the  
9 birds, especially given by their inefficient digestion (Frisch et al., 2007; Green & Sánchez,  
10 2006; Lovas-Kiss et al., 2020) and short retention times (Brochet, Guillemain, Gauthier-Clerc  
11 et al., 2010; Sánchez et al., 2012).

#### 12 *DNA isolation, amplification and sequencing*

13 DNA extraction from the filters and waterbird droppings was performed after the sampling  
14 campaign in 2018. The PowerSoil® DNA Isolation Kit (MO BIO Laboratories Inc., Carlsbad,  
15 CA, USA) was used, following the manufacturer's instructions. Extracted DNA samples were  
16 stored at -20 °C before shipping for amplification and sequencing at an external company  
17 (LGC Genomics, Berlin).

18 Prokaryotic 16S rRNA and microeukaryotic 18S rRNA gene amplification was carried  
19 out using the following primer pairs: EMBf 515F (GTGYCAGCMGCCGCGGTAA, Parada  
20 et al., 2016) – EMBr 806R (GGACTACNVGGGTWTCTAAT, Apprill et al., 2015) for the  
21 V4 region of the prokaryotic 16S rRNA gene and UnivF-1183mod  
22 (AATTTGACTCAACRCGGG) – UnivR-1443mod (GRGCATCACAGACCTG) (Ray et al.,  
23 2016) for the V7 region of the eukaryotic 18S rRNA gene. For each sample, the forward and  
24 reverse primers had the same 10-nt barcode sequence. Amplification of the target taxonomic  
25 marker gene regions and sequencing were carried out by LGC Genomics (Berlin, Germany).  
26 The PCRs included about 1-10 ng of DNA extract (total volume 1µl), 15 pmol of each  
27 forward primer and reverse primer in 20 µL volume of 1 x MyTaq buffer containing 1.5 units  
28 MyTaq DNA polymerase (Bioline GmbH, Luckenwalde, Germany) and 2 µl of BioStabII  
29 PCR Enhancer (Sigma-Aldrich Co.). Amplification was carried out for 30 cycles using the  
30 following parameters: 1 min 96 °C pre-denaturation; 96 °C denaturation for 15 s, 55 °C  
31 annealing for 30 s, 70 °C extension for 90 s, hold at 8 °C. About 20 ng amplicon DNA of each  
32 sample were pooled for up to 48 samples carrying different barcodes. The amplicon pools  
33 were purified with one volume Agencourt AMPure XP beads (Beckman Coulter, Inc., IN,  
34 USA) to remove primer dimers and other small mispriming products, followed by an  
35 additional purification on MiniElute columns (QIAGEN GmbH, Hilden, Germany). About  
36 100 ng of each purified amplicon pool DNA was used to construct Illumina libraries using the  
37 Ovation Rapid DR Multiplex System 1-96 (NuGEN Technologies, Inc., CA, USA). Illumina  
38 libraries (Illumina, Inc., CA, USA) were pooled and size selected by preparative gel  
39 electrophoresis. Sequencing was performed on an Illumina MiSeq using 300 bp paired-end  
40 format with a V3 Reagent Cartridge on the Illumina MiSeq platform, aiming for 50,000 raw  
41 sequence read pairs per sample. Sequencing was carried out in 48 samples/plate or 24  
42 samples/plate format to decrease overall index-hopping bias between samples. Only five lake  
43 samples were sequenced at the same time with bird dropping samples in 2 out of 13 runs.

#### 44 *Amplicon data analysis*

45 Sequence processing, taxonomic assignments and ASV picking were carried out with mothur  
46 v1.43.0 (Schloss et al., 2009) using the MiSeq SOP as reference  
47 ([http://www.mothur.org/wiki/MiSeq\\_SOP](http://www.mothur.org/wiki/MiSeq_SOP); Kozich et al., 2013, downloaded on 12th

1 November 2020). Additional quality filtering steps were also applied to eliminate possible  
2 sequence artifacts, such as the adjustment of the deltaq parameter to 10 in the 'make.contigs'  
3 command, primer removal from both ends of the sequences and the exclusion of singleton  
4 reads according to Kunin et al. (2010) before ASV identification. Denoising was performed  
5 using mothur's pre.cluster command using the default algorithm and applying the suggested 2  
6 bp difference cutoff. Chimeras were identified and removed using the mothur implemented  
7 version of VSEARCH. Read alignment and taxonomic assignment were carried out using the  
8 ARB-SILVA SSU Ref NR 138 reference database with a minimum bootstrap confidence  
9 score of 80 (Quast et al., 2013). ASVs assigned to non-primer-specific taxonomic groups  
10 ('Chloroplast', 'Mitochondria' and 'unknown') were subsequently removed from the dataset.  
11 For prokaryotic ASVs, the TaxAss software (Rohwer et al., 2018) was used with default  
12 parameters for taxonomic assignment with the FreshTrain (15 June 2020 release) and ARB-  
13 SILVA SSU Ref NR 138 databases, while taxonomic assignment of the 18S rRNA gene  
14 ASVs was performed using the PR2 v4.12.0 reference database (Guillou et al., 2013).

15 ASVs assigned to taxa Streptophyta, Metazoa, Ascomycota and Basidiomycota were  
16 excluded from the eukaryotic ASV set. Subsequently, both 16S and 18S ASV sets were  
17 rarefied to the read number of the sample having the lowest sequence count (8620 read per  
18 sample for the 16S set and 2432 read per sample for the 18S set).

### 19 *Statistical analysis*

20 We used the rarefied 16S (hereinafter referred to as prokaryotes) and 18S (microeukaryotes)  
21 community datasets separately in all our analyses. As our main aim was to quantify the  
22 potential dispersal of aquatic microorganisms by waterbirds, we excluded those organisms  
23 (both prokaryotes and microeukaryotes) that are likely not members of the natural aquatic  
24 community of the water samples. Accordingly, in case of both the aquatic community samples  
25 and the bird droppings, we only used ASVs that were present at least in one aquatic  
26 community sample with  $\geq 1\%$  relative abundance ("aquatic subset"). Since the subsetting  
27 resulted in different read numbers per sample, we converted the abundances to relative  
28 abundances prior to the statistical analyses. In the main part of the manuscript, we used only  
29 these aquatic subsets. This subsetting was carried out separately for prokaryotes and  
30 microeukaryotes. The resulting aquatic subset of waterbird droppings contained 1.9% ( $\pm 4.1\%$ )  
31 of the original prokaryotic and 4.5% ( $\pm 6.8\%$ ) of the microeukaryotic ASV abundances in  
32 these samples. The subset of aquatic communities contained 71.0% ( $\pm 12.7\%$ ) of the original  
33 prokaryotic and 84.2% ( $\pm 9.1\%$ ) of the microeukaryotic ASV abundances detected in the  
34 unselected datasets. The unselected ASV sets, the aquatic subsets and the related list of taxa  
35 were presented for both prokaryotes and microeukaryotes as supplementary data (Table S2-  
36 S9).

37 For a quantitative assessment of waterbird dispersal potential in the pondscape, we  
38 only used *A. anser* samples, being the only species from which we could collect samples in  
39 both years. To exclude a potential bias arising from the different sampling effort in soda pans  
40 vs bird droppings, a random re-sampling was performed based on the lowest sample size for  
41 both prokaryotes (n=19) and microeukaryotes (n=9) per sample group, resulting in a total of  
42 76 pro- and 36 microeukaryote samples used in these comparisons.

43 To estimate the possible significant effect of sample type (*A. anser* droppings vs.  
44 aquatic communities) and sampling year (2017 vs. 2018) on the local ASV richness ( $\alpha$ -  
45 diversity) and compositional change among samples (Whittaker's  $\beta$ -diversity:  $\beta = \gamma/\alpha$ ), non-  
46 parametric Scheirer-Ray-Hare test with an interaction term was run using the 'rcompanion' v.  
47 2.4.6 package (Mangiafico, 2021), followed by Dunn's post-hoc test for pairwise comparisons

1 with 'FSA' v. 0.9.1 package (Ogle et al., 2021) where p-values were adjusted with the  
2 Benjamini-Hochberg method.

3 We created stacked barplots to illustrate the quantitative differences of the higher-  
4 order prokaryotic and eukaryotic taxa among the sample groups. Prior to this, third level  
5 taxon names were assigned to the ASVs detected in the samples, thereafter ASV abundances  
6 belonging to the same taxon were summed up and expressed as relative abundance in each  
7 sample group. Taxa that did not reach 4% relative abundance at least in one of the four  
8 sample groups were combined in the category "Other".

9 Principal coordinate analysis (PCoA) was performed to illustrate the separation of  
10 samples according to sample type and sampling year with the 'vegan' v. 2.5-7 package  
11 (Oksanen et al., 2020). To test for significant differences in the same dataset, two-way  
12 PERMANOVA with an interaction term (based on 2000 permutations) was carried out,  
13 followed by a pairwise comparison of the four sample groups (based on 2000 permutations)  
14 with the 'pairwiseAdonis' v. 0.0.1 package (Arbizu, 2017). We ran additional SIMPER  
15 analyses to determine which ASVs are the most responsible for the dissimilarities among  
16 sample types and sampling years. In order to provide comparable results, PCoA,  
17 PERMANOVA, pairwise comparison and SIMPER were all run based on Bray-Curtis  
18 dissimilarity calculated from ASV relative abundance data.

19 We repeated our analyses based on the unselected datasets (i.e. without selecting for  
20 aquatic taxa) and presented those results in the Supplementary material (Table S11, S14,  
21 Figure S1, S2, S4-S6, S9-S10). To standardize sample sizes, re-sampling was carried out also  
22 for the unselected dataset of prokaryotes (n=25) and microeukaryotes (n=10) based on the  
23 lowest sample size resulting in a total of 100 pro- and 40 microeukaryote samples.

24 To compare prokaryotic and microeukaryotic ASV richness in each sample group  
25 (droppings of different waterbird species and aquatic community samples from both years),  
26 we applied sample-size-based rarefaction and extrapolation approach (Chao et al., 2014) using  
27 'iNEXT' v. 2.0.20 package (Hsieh et al., 2020). The 95% confidence intervals were  
28 constructed by bootstrapping (based on 50 bootstrap replications).

29 To reveal if different waterbird species transport different microbial communities, and  
30 whether they differ among the two sampling years, we performed separate PCoA analyses  
31 including the waterbird species from which samples were collected in at least one year  
32 (sample numbers after re-sampling the amplicon data are presented in Table S1).

33 We excluded *R. avosetta* from the comparative analyses of different waterbird species  
34 and aquatic community samples due to the low number of samples (Table S1). However, we  
35 present the raw sequence reads in the data depository and the ASV sets with the related  
36 taxonomic list as supplementary files (Table S2-S9) for each of the five waterbird species.

37 All analyses focusing on community composition were furthermore repeated for  
38 incidence data based on Sørensen dissimilarity.

39 Statistical analyses were carried out using R v. 4.1.1 statistical software (R Core  
40 Team, 2021).

41

## 42 **Results**

43 We found a consistent difference between the number of prokaryotic and microeukaryotic  
44 ASVs in the two main sample types (*Anser anser* droppings and aquatic communities) after

1 rarefaction. Local ASV richness ( $\alpha$ -diversity) was significantly higher in the aquatic  
2 community samples (in both years), while compositional variation ( $\beta$ -diversity) was higher  
3 among the *A. anser* samples, especially in prokaryotes. In line with the local richness,  
4 regional ASV richness ( $\gamma$ ) was also higher in the aquatic communities in both prokaryotes and  
5 microeukaryotes. In general, there was no remarkable difference in the diversity metrics  
6 between the two sampling years (Figure 2, Table S10), however, in 2017, microeukaryotic  $\beta$ -  
7 diversity did not differ significantly between the two sample types (aquatic community and *A.*  
8 *anser* droppings). When repeating the analyses for the unselected prokaryotic and  
9 microeukaryotic community datasets (thereby also including the gut microbiome, possible  
10 parasites of waterbirds and other non-aquatic microorganisms), patterns of  $\alpha$ - and  $\gamma$ -diversity  
11 were similar to the results based on the aquatic subset (i.e. less ASVs in *A. anser* samples  
12 independent of sampling year), however,  $\beta$ -diversity was low in case of both sample types in  
13 both years (Figure S1, Table S11).

14 In line with this, the majority of ASVs were found only in the aquatic habitats, with  
15 most ASVs shared between years (Figure 3, Venn diagrams). Even so, we detected a  
16 considerable proportion of ASVs present in aquatic habitats also in the *A. anser* samples: 28%  
17 of the prokaryotic and 19% of the microeukaryotic ASVs were shared among both types of  
18 samples, with 19-19% (2017 and 2018, prokaryotes) and 9-10% (2017 and 2018,  
19 microeukaryotes) of ASVs being shared among birds and aquatic communities within the  
20 same year (Figure 3). Among prokaryotes, 9% of the ASV were found in all four sample  
21 groups (both sample types in both years; Figure 3). Compared to this, the share of  
22 microeukaryotic ASVs present in all four sample groups was low (3%) (Figure 3). In the  
23 unselected community datasets, trends and differences were similar to those observed in our  
24 aquatic data subsets, except for the high number of ASVs unique to *A. anser* samples (33%  
25 for prokaryotes and 26% for microeukaryotes) (Figure S2).

26 At the level of major taxonomic units, all four sample groups were dominated by the  
27 same phylogenetic groups, both in prokaryotes and microeukaryotes (Figure 3).  
28 Gammaproteobacteria, Bacteroidia and Alphaproteobacteria were the most abundant  
29 classified prokaryotes, making up 26-31% of the ASV abundances found in the aquatic  
30 communities and 53-76% in the *A. anser* samples. However, some taxa such as Bacilli and  
31 Thermoleophilia were abundant in the aquatic communities in both years (9-10% together),  
32 but were either completely missing (Bacilli in 2018) or represented only with very low  
33 abundances (0.03-0.3% together) in the *A. anser* droppings. In contrast, the relative  
34 abundance of Gammaproteobacteria was higher in the *A. anser* droppings (41-60%) compared  
35 to the aquatic community samples (7-8%, Figure 3).

36 In microeukaryotes, Chlorophyta, Apicomplexa and Fungi were the most abundant  
37 among the classified taxonomic groups, altogether representing 29-31% of the ASV  
38 abundances in the aquatic communities and 20-29% in the *A. anser* droppings. There were  
39 also several groups that were abundant in the aquatic communities in both years (15-22%  
40 together) but were not characteristic in the *A. anser* samples (0-0.3% together), e.g. Cercozoa,  
41 Katablepharidophyta and Ochrophyta. However, Opalozoa was represented with higher  
42 abundance in *A. anser* samples (9-19%) than in the aquatic communities (0.2-1%) (Figure 3).

43 On the PCoA plots, the separation of prokaryotic samples according to sample type  
44 (aquatic communities against *A. anser* droppings) was more explicit compared to the  
45 microeukaryotic samples (Figure 4). At the same time, the PERMANOVA tests resulted in a  
46 significant effect of sample type in both cases (Table 1). Both prokaryotic and  
47 microeukaryotic samples were less separated by year (Figure 4), which was in line with the  
48 stronger effect (indicated by higher  $R^2$  values) of sample type compared to year (though both



1 were significant) based on PERMANOVA tests (Table 1). Pairwise comparisons of the four  
2 sample groups showed similar significant differences with overall higher  $R^2$  values for pairs  
3 of different sample types in prokaryotes, while in microeukaryotes the difference was  
4 significant only for the pairs of different sample types (*A. anser* or aquatic communities;  
5 Table 1). A subsequent SIMPER analysis (Table S12) showed that the ASVs most responsible  
6 for these differences belonged to the dominant higher order taxa (Figure 3) and there was a  
7 complete overlap between the ASVs most responsible for the differences in sample type and  
8 sampling year (Table S12). The general patterns in the PCoA, PERMANOVA and pairwise  
9 comparisons repeated for the incidence and unselected data subsets were highly similar in  
10 both prokaryotes and microeukaryotes with clearer differences among sample types and  
11 sampling years (Table S13–S14, Figure S3–S5).

12 We finally compared the richness (Figure 5, Figure S6) and composition (Figure S7–  
13 S10) of microbes detected in the droppings of four waterbird species. Similar to the results  
14 based on rarefaction for *A. anser* droppings (Figure 2–3), only a fraction of the total species  
15 pool was recaptured in each waterbird species, but the actual proportion changed with species.  
16 The shorebirds, *C. pugnax* transported a similar fraction of microeukaryotic ASVs as geese  
17 (*A. anser*), both as individuals (mean richness) and collectively (the latter evidenced by  
18 regional extrapolated richness). Compared to them, *S. clypeata* proved to be much more  
19 efficient dispersal agents for microeukaryotes, dispersing almost twice as many ASVs as a  
20 same-sized group of any of the other species (Figure 5). Furthermore, we essentially found a  
21 similar number of microeukaryotic ASVs per *S. clypeata* dropping as in a random aquatic  
22 sample (Figure 5). PCoA ordinations both with abundance- and incidence-based data also  
23 showed a clear separation of *S. clypeata* from the rest of the waterbirds (Figure S7–S8).

24 The comparison of waterbird species yielded somewhat different results for  
25 prokaryotes, where *S. clypeata* droppings no longer hosted significantly higher ASV richness  
26 than most of the other species (except for *A. albifrons*), and showed a large compositional  
27 overlap with communities potentially dispersed by shorebirds (*C. pugnax*) (Figure S7). Due to  
28 low read numbers for microeukaryotes in case of *A. albifrons*, in the two goose species, *A.*  
29 *anser* and *A. albifrons*, we could only compare the composition of prokaryotes in their  
30 droppings, where the difference we found was negligible (Figure S7–S8). While the overall  
31 composition of the detected set of prokaryotes was very similar among individual birds  
32 (Figure S7–S8), *A. albifrons* collectively transported a significantly lower diversity of ASVs:  
33 approximately only the half of those found in *A. anser* droppings (Figure 5).

34 In the unselected datasets, the prokaryotic and microeukaryotic communities  
35 transported by different bird species were much more distinct (Figure S9–S10), but even  
36 there, *A. anser* and *A. albifrons* samples showed high similarity.

37

## 38 Discussion

39 The main novelty of our study is twofold. First, it represents the first comprehensive study on  
40 the role waterbirds play in the dispersal of aquatic microorganisms using DNA metabarcoding  
41 targeting communities of prokaryotes and unicellular microeukaryotes. We provided evidence  
42 that waterbirds potentially can disperse all major aquatic groups from bacteria through  
43 phytoplankton to protozoa. Second, we directly compared microorganisms that may be  
44 dispersed by waterbirds to the source pool (natural aquatic communities), thereby being able  
45 to investigate the share and identity of aquatic microbes readily transported by waterbirds. In  
46 this confined set of aquatic habitats (i.e., metacommunity), we indeed found a considerable  
47 share of aquatic communities detected in waterbird droppings. Although the difference among

1 sample types (aquatic communities and *A. anser* droppings) was in general more conspicuous,  
2 the actual set of prokaryote ASVs detected in the bird droppings also showed differences  
3 between the two years, where the potentially dispersed set of microbes reflected the actual  
4 aquatic communities. This provided further evidence for the dispersal potential of waterbirds.  
5 Finally, the communities detected in the droppings of different waterbird species showed high  
6 similarities (regardless of their lifestyle), with a number of specific differences. The  
7 implications of our results showed minor sensitivity to the selection methods (unselected  
8 dataset or aquatic subset) or data type (abundance or incidence), and were largely consistent  
9 across prokaryotes and microeukaryotes. Altogether, our study provided the first explicit  
10 quantitative evidence clearly supporting that waterbirds are so far overlooked, yet potentially  
11 important dispersal agents of natural communities of aquatic microorganisms.

12 Prokaryotic and microeukaryotic communities of the aquatic subset were typical for  
13 soda lakes and pans of the region (Sinclair et al., 2015; Szabó et al., 2017, 2020). We found  
14 that 28% of the prokaryotic and 19% of the aquatic microeukaryotic ASVs were also present  
15 in the droppings of the dominant waterbirds species of the region, *A. anser*. Instead of  
16 dispersing a single or only a limited number of aquatic taxa, most of the major taxonomic  
17 groups of the aquatic communities were well-represented in the *A. anser* droppings. In  
18 waterbirds, gut retention time is short (Brochet, Guillemain, Gauthier-Clerc et al., 2010;  
19 Sánchez et al., 2012), which can contribute to a large share of undigested microorganisms. In  
20 extreme cases, even live plants (Silva et al., 2018), diatoms (Atkinson, 1971, 1980), aquatic  
21 invertebrates (Frisch et al., 2007; Green & Sánchez, 2006) and gelatinous fish eggs (Lovas-  
22 Kiss et al., 2020) can survive waterbird gut passage. Compared to them, the survival of  
23 microorganisms should be even higher, given their evolutionary adaptations to adverse  
24 conditions such as extreme values of pH, desiccation or UV radiation (Potts, 1999; Rainey et  
25 al., 2005; Schleper et al., 1995). Even though we did not test the viability of the detected  
26 microbes directly, these altogether make it highly likely that the ASVs we found included  
27 viable cells and hence indicate the possibility of successful dispersal events.

28 We found that community composition of microbes, i.e., both the prokaryotic and  
29 microeukaryotic communities in the aquatic samples, and the dispersed ASV set in *A. anser*  
30 droppings were different between the two years. Besides, the difference in aquatic prokaryotic  
31 communities was also reflected by the communities found in the droppings (as evidenced by  
32 the PCoA plots). These altogether indicate that the set of potentially dispersed prokaryotes  
33 reflects the natural microbial communities available in the local aquatic habitats at the given  
34 time. That is, our observations confirm the previous assumption that internal dispersal  
35 depends on the availability of aquatic (food) organisms (e.g. Brochet, Guillemain, Fritz, et al.,  
36 2010; Frisch et al., 2007), which can vary in time and is facilitated by the weak digestion  
37 efficiency mentioned above.

38 Even though *A. anser* do not feed directly from the water but rather consume seeds,  
39 stems and leaves of aquatic macrophytes and terrestrial plants (Middleton & van der Valk,  
40 1987), they can pick up microbes while drinking and while feeding on aquatic macrophytes or  
41 even while preening their damp feathers after bathing. Our results showed that this feeding  
42 mode still makes them potentially efficient dispersal agents for aquatic microbial  
43 metacommunities. At the same time, we showed a high heterogeneity of prokaryotic and  
44 microeukaryotic ASV composition across bird droppings, indicating stochastic pickup by the  
45 individual birds. Although the difference in local and regional richness between droppings  
46 and aquatic communities was still remarkable, the compositional variation among droppings  
47 was moderated when *A. anser* gut microbiota was also considered, leading us to the  
48 conclusion that the gut microorganism composition of *A. anser* is specific to the species. This

1 is in line with the findings of Laviad-Shitrit et al. (2019) that waterbird species host unique  
2 gut bacterial communities.

3 We found that not only *A. anser* but the other three bird species can also transport a  
4 considerable share of the natural microbial communities present in the ponds. While we found  
5 some differences between the waterbird species, these were not completely congruent with  
6 their feeding habits and habitat use. In spite of the terrestrial feeding habit of *A. anser*, the  
7 number of ASVs transported by them was largely comparable to those found in shorebirds, *C.*  
8 *pugnax*, which prefer to feed in the shallow shoreline regions of ponds (Baccetti et al., 1998)  
9 and may directly consume biofilm communities as shown for multiple *Calidris* spp. (Kuwa  
10 et al., 2008, 2012). According to our results, they all can disperse quite similar  
11 microeukaryotic communities across aquatic habitats.

12 When considering the potentially dispersed prokaryotes, we did not find remarkable  
13 differences among the different bird species, neither in ASV richness, nor in composition. *A.*  
14 *anser* and *A. albifrons* transported quite similar prokaryotic communities and their gut  
15 microbiome also seems to be largely the same, which is not surprising given that both have a  
16 predominantly terrestrial herbivorous feeding habit (Ely & Raveling, 2011; Middleton & van  
17 der Valk, 1987). Nevertheless, of the two, *A. anser* hosted a higher number of ASVs in their  
18 droppings, which implies that it might have a more important role in the endozoochory of  
19 prokaryotes.

20 The only species that showed marked differences from the rest of the waterbirds was  
21 *S. clypeata*. They not only transported different microeukaryotic communities but also  
22 captured a much larger fraction of the aquatic source pool, therefore they can be considered as  
23 the most effective dispersal agents. However, in terms of transporting prokaryotes, they were  
24 no longer so prominent. A reasonable explanation for our observations can be that *S. clypeata*,  
25 unlike the other waterbirds we studied, is a planktivore species sieving plankton from the  
26 open water (Matsubara et al., 1994). The low interlamellar distances in its specialized spoon-  
27 shaped bill enable an effective accumulation of aquatic microorganisms even smaller than 500  
28  $\mu\text{m}$  (Gurd, 2007; Kooloos et al., 1989). Thus, microeukaryotes and their propagules of this  
29 size can be easily captured and concentrated, whereas bacterioplankton with a smaller size  
30 fraction probably flows through their lamellae.

31 Altogether, our results are based on a representative comparison of equal sample sizes  
32 across aquatic habitats and bird droppings. We proved that within small-scale pond and lake  
33 networks (10-20 km), waterbirds can be important dispersal agents of both prokaryotes and  
34 microeukaryotes, given that the spatial scale of such pondscoapes coincides with the local daily  
35 movements of waterbirds, including *A. anser* (Bell, 1988; Boos et al., 2019; Link et al., 2011;  
36 Nilsson & Persson, 1992). As the study region might host up to hundreds of thousands of  
37 waterbirds (Dick et al., 1994), which themselves might defecate even up to 80 times per day  
38 (Oláh, 2003; Sterbetz, 1992), their overall contribution to biotic connectivity is expected to be  
39 immense, eventually being able to transport most members of the aquatic microbial  
40 metacommunity among the habitats.

41 Finally, this study also has important implications for larger spatial scales. According  
42 to their flight speed and gut retention times, waterbirds are able to transport their intestinal  
43 contents over thousands of kilometers during their migration (Viana et al., 2013a, 2013b,  
44 2016), and therefore can be important dispersal agents of aquatic microorganisms not only on  
45 regional but even on continental scales. By dispersing microorganisms, they can have a  
46 significant role in forming biodiversity patterns and sustaining ecosystem functions where the

1 importance of microbes is indisputable (Bell et al., 2005; Graham et al., 2016; Wohl et al.,  
2 2004).  
3

1 Table 1. Results of PERMANOVA and pairwise comparison performed on the aquatic subset  
 2 (relative abundance data, Bray-Curtis dissimilarity; permutations=2000) of prokaryotic and  
 3 microeukaryotic communities detected in aquatic community (AC) and *Anser anser* dropping  
 4 samples in 2017 and 2018.

| Factors                                     | Prokaryotes |        |        |                |                |                  |     | Microeukaryotes |        |       |                |                |                  |     |
|---------------------------------------------|-------------|--------|--------|----------------|----------------|------------------|-----|-----------------|--------|-------|----------------|----------------|------------------|-----|
|                                             | Df          | SS     | MS     | F              | R <sup>2</sup> | p                |     | Df              | SS     | MS    | F              | R <sup>2</sup> | p                |     |
| Sample type                                 | 1           | 3.977  | 3.977  | 11.548         | 0.125          | 0.0005           | *** | 1               | 0.929  | 0.929 | 2.058          | 0.056          | 0.0005           | *** |
| Sampling year                               | 1           | 1.684  | 1.685  | 4.892          | 0.053          | 0.0005           | *** | 1               | 0.592  | 0.592 | 1.312          | 0.036          | 0.0295           | *   |
| Sample type*sampling year                   | 1           | 1.274  | 1.274  | 3.699          | 0.040          | 0.0015           | **  | 1               | 0.511  | 0.511 | 1.133          | 0.031          | 0.1894           | ns  |
| Residuals                                   | 72          | 24.794 | 0.344  |                | 0.781          |                  |     | 32              | 14.441 | 0.451 |                | 0.877          |                  |     |
| Total                                       | 75          | 31.729 |        |                | 1.000          |                  |     | 35              | 16.473 |       |                | 1.000          |                  |     |
| Pairs                                       | Df          | SS     | F      | R <sup>2</sup> | p              | P <sub>adj</sub> |     | Df              | SS     | F     | R <sup>2</sup> | p              | P <sub>adj</sub> |     |
| 2017 <i>A. anser</i> - 2017 AC              | 1           | 2.805  | 8.325  | 0.188          | 0.0005         | 0.0030           | **  | 1               | 0.734  | 1.672 | 0.095          | 0.0020         | 0.0120           | *   |
| 2017 <i>A. anser</i> - 2018 <i>A. anser</i> | 1           | 1.754  | 4.701  | 0.116          | 0.0005         | 0.0030           | **  | 1               | 0.624  | 1.355 | 0.078          | 0.0745         | 0.4468           | ns  |
| 2017 <i>A. anser</i> - 2018 AC              | 1           | 3.486  | 11.512 | 0.242          | 0.0005         | 0.0030           | **  | 1               | 0.746  | 1.673 | 0.095          | 0.0025         | 0.0150           | *   |
| 2017 AC - 2018 <i>A. anser</i>              | 1           | 2.175  | 5.636  | 0.135          | 0.0005         | 0.0030           | **  | 1               | 0.775  | 1.697 | 0.096          | 0.0005         | 0.0030           | **  |
| 2017 AC - 2018 AC                           | 1           | 1.204  | 3.815  | 0.096          | 0.0005         | 0.0030           | **  | 1               | 0.480  | 1.085 | 0.063          | 0.2824         | 1.0000           | ns  |
| 2018 <i>A. anser</i> - 2018 AC              | 1           | 2.445  | 6.951  | 0.162          | 0.0005         | 0.0030           | **  | 1               | 0.706  | 1.522 | 0.087          | 0.0005         | 0.0030           | **  |

5

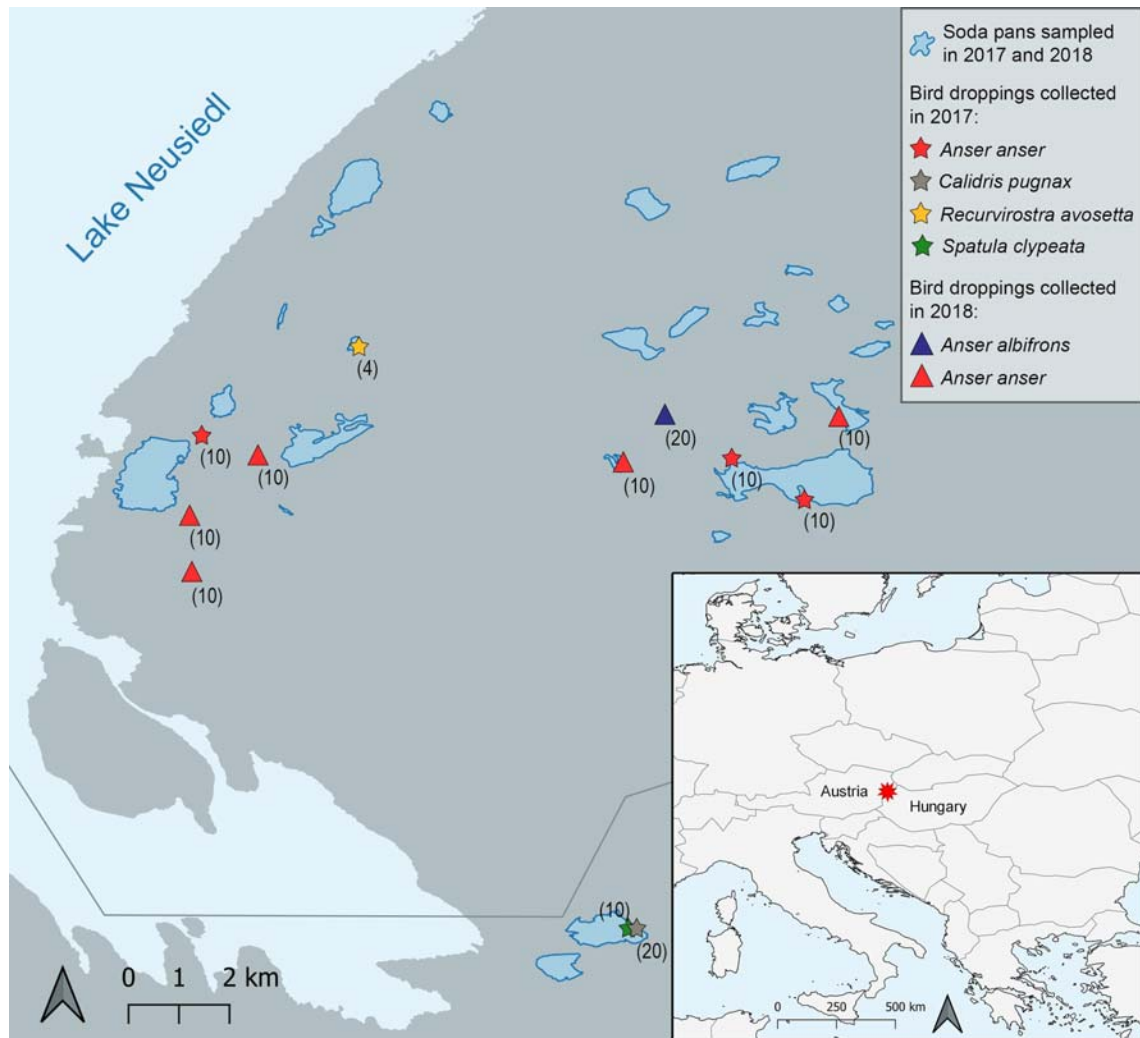

1

2 Figure 1. Map of the region and the sampling sites. Projection of the map is EPSG:4326  
3 (WGS84). All the soda pans from which samples were collected are indicated with blue  
4 polygons, while symbols highlight the spots where bird dropping samples were collected. The  
5 number of collected bird dropping samples is indicated in brackets.

6

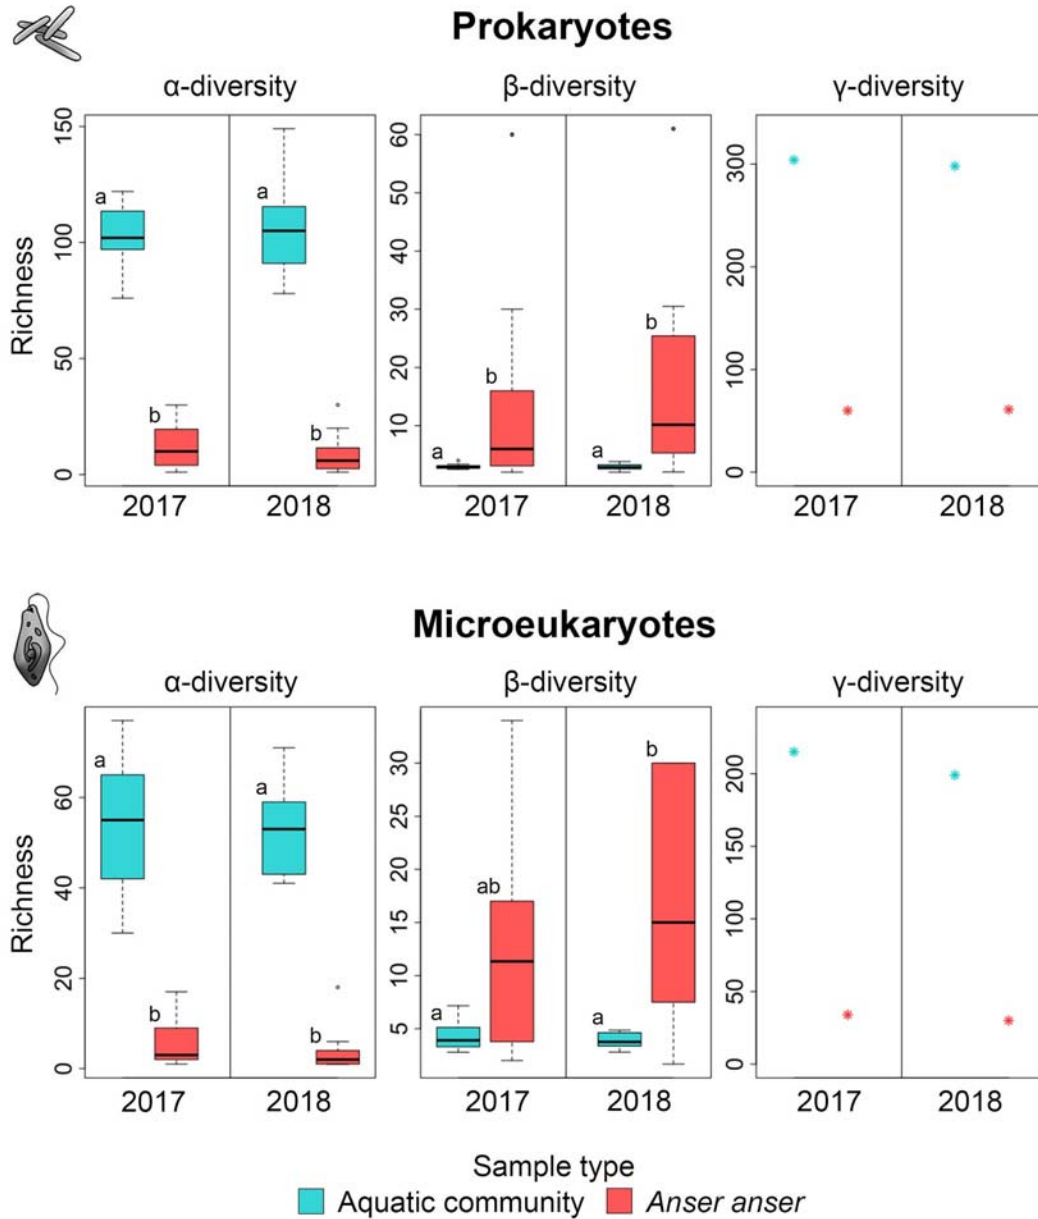

1  
2 Figure 2.  $\alpha$ -,  $\beta$ - and  $\gamma$ -diversity of the prokaryotic and microeukaryotic aquatic subsets in  
3 aquatic communities and *Anser anser* droppings in 2017 and 2018. Different letters indicate  
4 statistically significant differences in  $\alpha$ - and  $\beta$ -diversity at a significance level of  $p_{adj} < 0.05$   
5 based on Dunn's pairwise post-hoc test. Pairwise  $\gamma$ -diversity comparisons are presented in  
6 Figure 5.

7

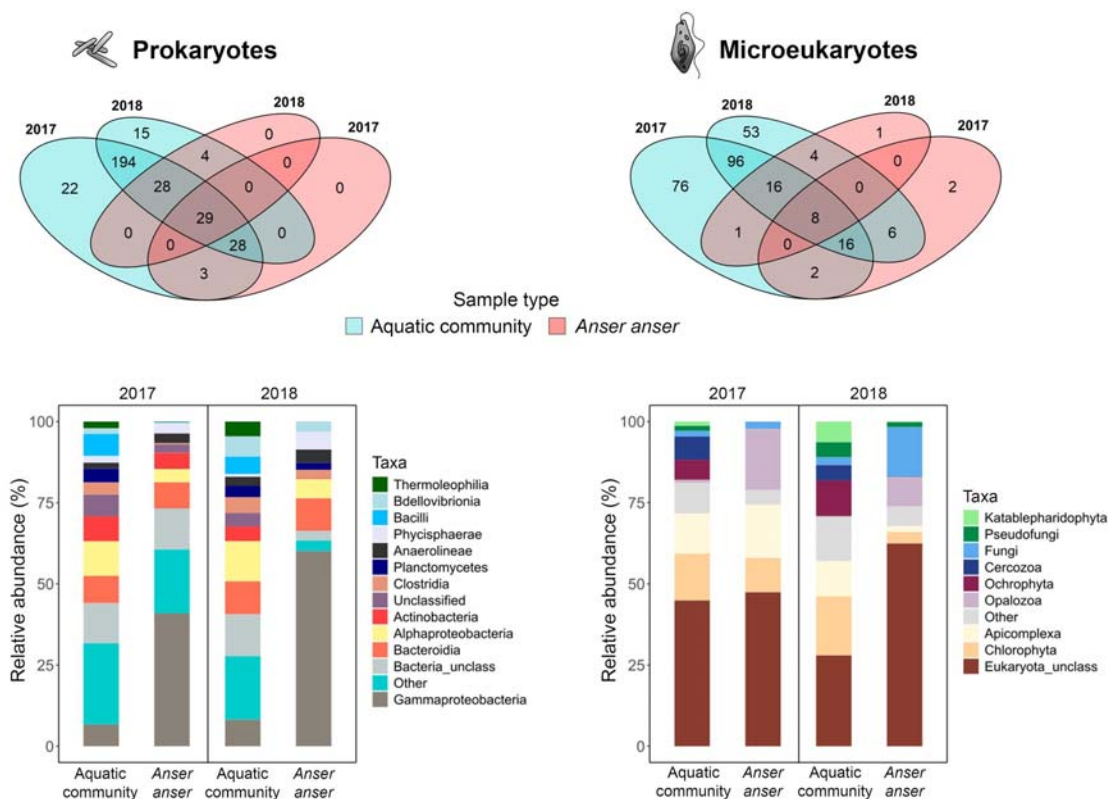

1

2 Figure 3. Number of prokaryotic and microeukaryotic ASVs (above) shared among sample  
 3 types (aquatic community and *Anser anser* droppings) and years, and the relative abundance of  
 4 higher-order taxa (below) in the aquatic subsets.

5



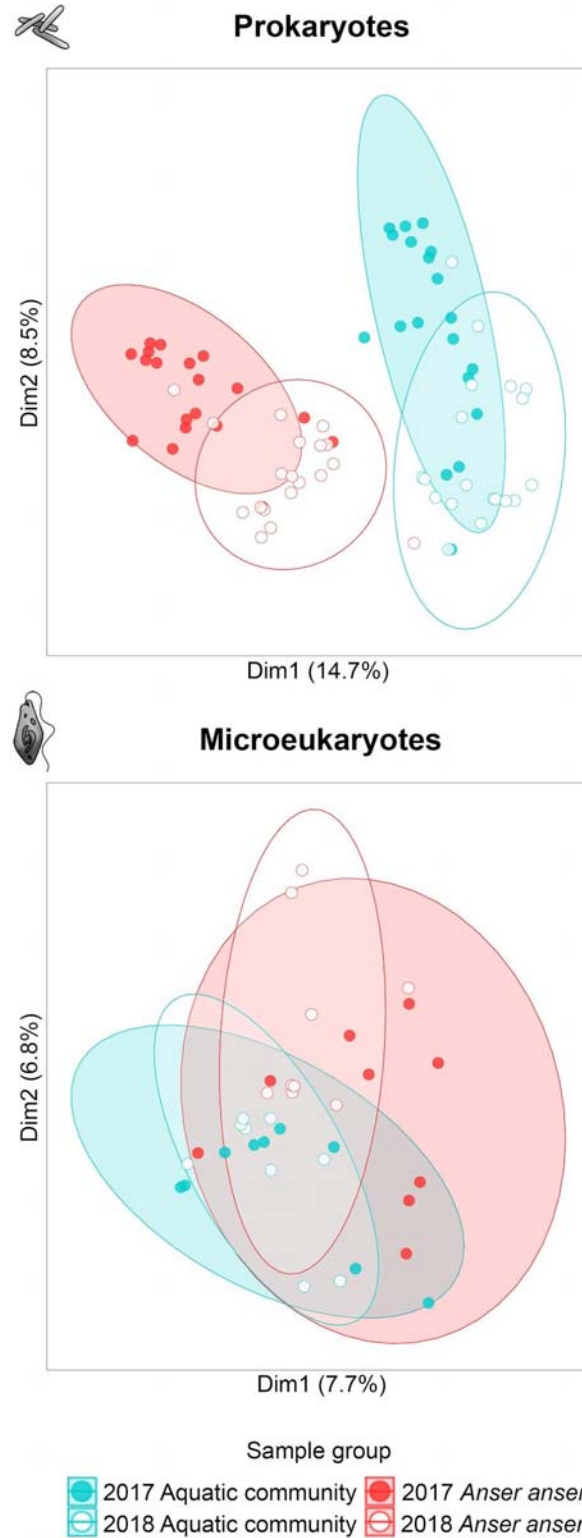

1

2 Figure 4. PCoA biplot of aquatic community and *Anser anser* dropping samples collected in  
3 2017 and 2018. The analysis is based on the aquatic subset (relative abundance data, Bray-  
4 Curtis dissimilarity) of prokaryotic and microeukaryotic communities.

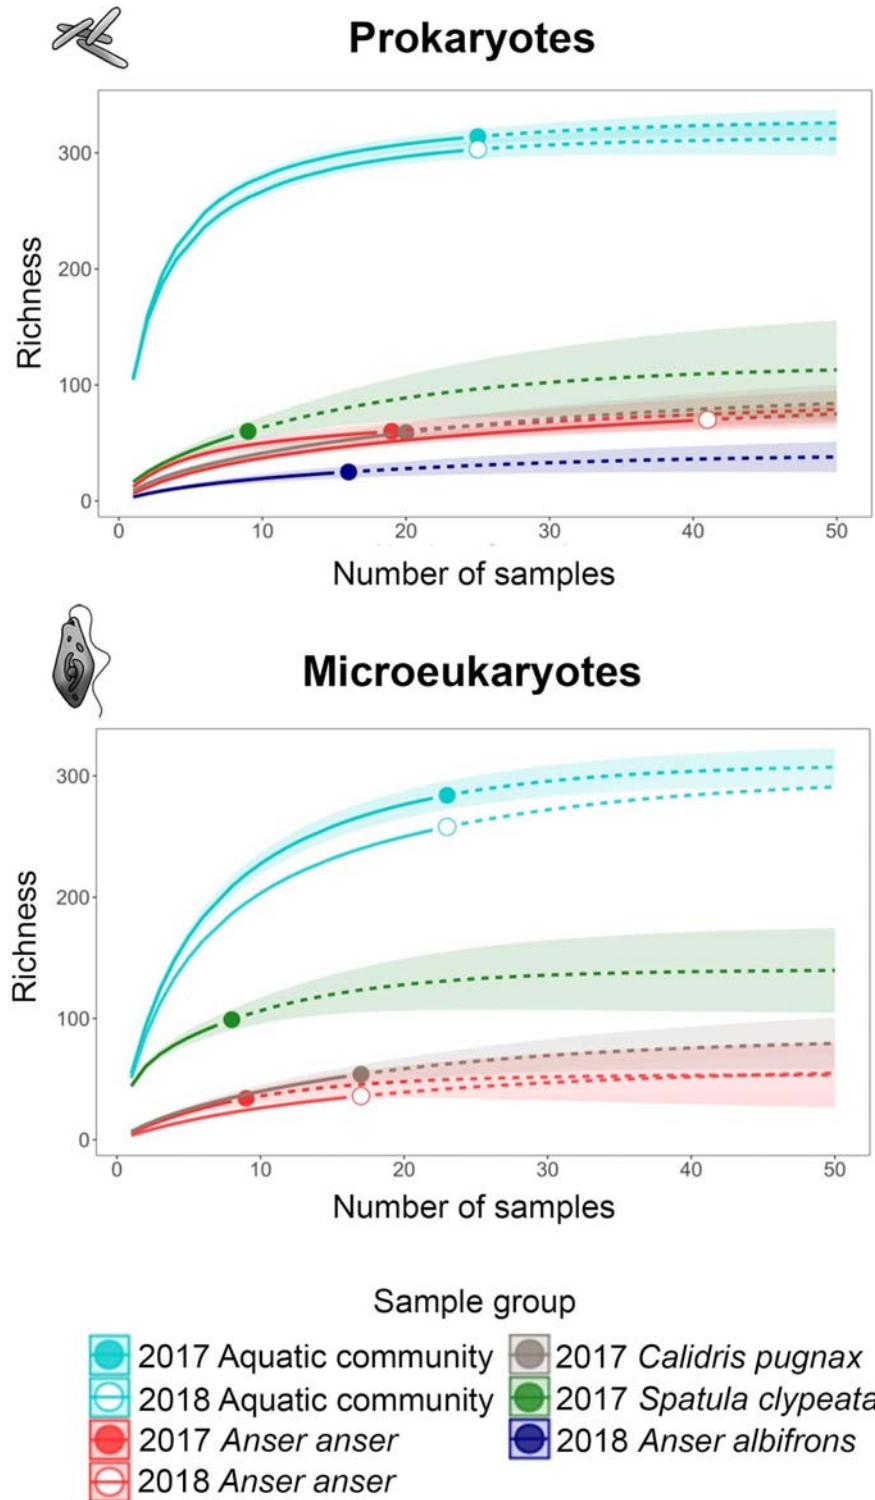

1

2 Figure 5. Accumulation curves with extrapolated ASV richness estimates (dashed lines) and  
3 95% confidence intervals for the aquatic subsets of prokaryotes and microeukaryotes detected  
4 in the droppings of four waterbird species compared to the aquatic communities.

5

1 **Data availability statement**

- 2 Raw sequence reads were deposited in the NCBI SRA database and are accessible through the
- 3 BioProject accession PRJNA748202.

## 1 **References**

- 2 Apprill, A., McNally, S., Parsons, R., & Weber, L. (2015). Minor revision to V4 region SSU  
3 rRNA 806R gene primer greatly increases detection of SAR11 bacterioplankton. *Aquatic*  
4 *Microbial Ecology*, 75, 129–137. <https://doi.org/10.3354/ame01753>
- 5 Arbizu, P. M. (2017). pairwiseAdonis: Pairwise multilevel comparison using adonis. – R  
6 package version 0.0.1. <https://github.com/pmartinezarbizu/pairwiseAdonis>
- 7 Atkinson, K. M. (1971). Further experiments in dispersal of phytoplankton by birds.  
8 *Wildfowl*, 22, 98–99.
- 9 Atkinson, K. M. (1980). Experiments in dispersal of phytoplankton by ducks. *British*  
10 *Phycological Journal*, 15, 49–58. <https://doi.org/10.1080/00071618000650061>
- 11 Baas-Becking, L. G. M. (1934). *Geobiologie of inleiding tot de milieukunde*. W. P. Van  
12 Stockum and Zoon, The Hague.
- 13 Baccetti, N., Chelazzi, L., Colombini, I., & Serra, L. (1998). Preliminary data on the diet of  
14 migrating ruffs *Philomachus pugnax* in northern Italy. *International Wader Studies*, 10, 361–  
15 364.
- 16 Bannar-Martin, K. H., Kremer, C. T., Ernest, S. M., Leibold, M. A., Auge, H., Chase, J., ...  
17 Supp, S. R. (2018). Integrating community assembly and biodiversity to better understand  
18 ecosystem function: the Community Assembly and the Functioning of Ecosystems (CAFE)  
19 approach. *Ecology Letters*, 21, 167–180. <https://doi.org/10.1111/ele.12895>
- 20 Beijerinck, M. W. (1913). *De infusies en de ontdekking der bacteriën*. *Jaarboek van de*  
21 *Koninklijke Akademie voor Wetenschappen*. Amsterdam, Johannes Müller.
- 22 Bell, M. V. (1988). Feeding behaviour of wintering pink-footed and greylag geese in north-  
23 east Scotland. *Wildfowl*, 39, 43–53.
- 24 Bell, T., Newman, J. A., Silverman, B. W., Turner, S. L., & Lilley, A. K. (2005). The  
25 contribution of species richness and composition to bacterial services. *Nature*, 436, 1157–  
26 1160. <https://doi.org/10.1038/nature03891>
- 27 BirdLife International (2021a). *Important Bird Areas factsheet: Lake Fertő*.
- 28 BirdLife International (2021b). *Important Bird Areas factsheet: Southern Seewinkel and*  
29 *Zitzmannsdorfer Wiesen*.
- 30 Blagodatski, A., Trutneva, K., Glazova, O., Mityaeva, O., Shevkova, L., Kegeles, E., ...  
31 Volchkov, P. (2021). Avian influenza in wild birds and poultry: Dissemination pathways,  
32 monitoring methods, and virus ecology. *Pathogens*, 10, 630.  
33 <https://doi.org/10.3390/pathogens10050630>
- 34 Boos, M., Nesterova, A. P., Chevallerier, D., & Follestad, A. (2019). Migratory flights and local  
35 wintering movements of greylag geese *Anser anser* in western Europe. *Bird Study*, 66, 264–  
36 268. <https://doi.org/10.1080/00063657.2019.1620171>
- 37 Boros, E., V.-Balogh, K., Vörös, L., & Horváth, Z. (2017). Multiple extreme environmental  
38 conditions of intermittent soda pans in the Carpathian Basin (Central Europe). *Limnologica*,  
39 62, 38–46. <https://doi.org/10.1016/j.limno.2016.10.003>

- 1 Briscoe, A. G., Nichols, S., Hartikainen, H., Knipe, H. Foster, R., Green, A. J., ... Bass, D.  
2 (2021). High-throughput sequencing of faeces provides evidence for dispersal of parasites and  
3 pathogens by migratory waterbirds. *Molecular Ecology Resources*.  
4 <https://doi.org/10.1111/1755-0998.13548>
- 5 Brochet, A. L., Gauthier-Clerc, M., Guillemain, M., Fritz, H., Waterkeyn, A., Baltanás, Á., &  
6 Green, A. J. (2010). Field evidence of dispersal of branchiopods, ostracods and bryozoans by  
7 teal (*Anas crecca*) in the Camargue (southern France). *Hydrobiologia*, 637, 255–261.  
8 <https://doi.org/10.1007/s10750-009-9975-6>
- 9 Brochet, A. L., Guillemain, M., Fritz, H., Gauthier-Clerc, M., & Green, A. J. (2010). Plant  
10 dispersal by teal (*Anas crecca*) in the Camargue: duck guts are more important than their feet.  
11 *Freshwater Biology*, 55, 1262–1273. <https://doi.org/10.1111/j.1365-2427.2009.02350.x>
- 12 Brochet, A. L., Guillemain, M., Gauthier-Clerc, M., Fritz, H., & Green, A. J. (2010).  
13 Endozoochory of Mediterranean aquatic plant seeds by teal after a period of desiccation:  
14 Determinants of seed survival and influence of retention time on germinability and viability.  
15 *Aquatic Botany*, 93, 99–106. <https://doi.org/10.1016/j.aquabot.2010.04.001>
- 16 Chao, A., Gotelli, N. J., Hsieh, T. C., Sander, E. L., Ma, K. H., Colwell, R. K., & Ellison, A.  
17 M. (2014). Rarefaction and extrapolation with Hill numbers: a framework for sampling and  
18 estimation in species diversity studies. *Ecological Monographs*, 84, 45–67.  
19 <https://doi.org/10.1890/13-0133.1>
- 20 Cho, J.-C., & Tiedje, J. M. (2000). Biogeography and degree of endicity of fluorescent  
21 *Pseudomonas* strains in soil. *Applied and Environmental Microbiology*, 66, 5448–5456.  
22 <https://doi.org/10.1128/AEM.66.12.5448-5456.2000>
- 23 Clobert, J., Baguette, M., Benton, T. G., & Bullock, J. M. (2012). *Dispersal ecology and*  
24 *evolution*. Oxford University Press.
- 25 Dick, G., Dvorak, M., Grüll, A., Kohler, B., & Rauer, G. (1994). Vogelparadies mit Zukunft?  
26 Ramsar-Bericht 3 Neusiedler See - Seewinkel. Umweltbundesamt, Wien.
- 27 Dvorak, M., Wendelin, B., & Laber, J. (2020). *Projekt Vogelwarte Madárvárta 2.*  
28 *Angewandte ornithologische Forschung. Teil 3 Wasservogel- und Limikolenzählung.*  
29 Research Report. BirdLife Österreich, Wien.
- 30 Ely, C., & Raveling, D. G. (2011). Seasonal variation in nutritional characteristics of the diet  
31 of greater white-fronted geese. *The Journal of Wildlife Management*, 75, 78–91.  
32 <https://doi.org/10.1002/jwmg.13>
- 33 Figuerola, J., & Green, A. J. (2002a). Dispersal of aquatic organisms by waterbirds: a review  
34 of past research and priorities for future studies. *Freshwater Biology*, 47, 483–494.  
35 <https://doi.org/10.1046/j.1365-2427.2002.00829.x>
- 36 Figuerola, J., & Green, A. J. (2002b). How frequent is external transport of seeds and  
37 invertebrate eggs by waterbirds? A study in Doñana, SW Spain. *Archiv für Hydrobiologie*,  
38 155, 557–565. <https://doi.org/10.1127/archiv-hydrobiol/155/2002/557>
- 39 Figuerola, J., Green, A. J., & Santamaría, L. (2003). Passive internal transport of aquatic  
40 organisms by waterfowl in Doñana, south-west Spain. *Global Ecology and Biogeography*, 12,  
41 427–436. <https://doi.org/10.1046/j.1466-822X.2003.00043.x>

- 1 Frisch, D., Green, A. J., & Figuerola, J. (2007). High dispersal capacity of a broad spectrum  
2 of aquatic invertebrates via waterbirds. *Aquatic Sciences*, 69, 568–574.  
3 <https://doi.org/10.1007/s00027-007-0915-0>
- 4 García-Álvarez, A., van Leeuwen, C. H. A., Luque, C. J., Hussner, A., Vélez-Martín, A.,  
5 Pérez-Vázquez, A., ... Castellanos, E. M. (2015). Internal transport of alien and native plants  
6 by geese and ducks: an experimental study. *Freshwater Biology*, 60, 1316–1329.  
7 <https://doi.org/10.1111/fwb.12567>
- 8 Garmyn, A., Van Rooij, P., Pasmans, F., Hellebuyck, T., Van Den Broeck, W., Haesebrouck,  
9 F., & Martel, A. (2012). Waterfowl: potential environmental reservoirs of the chytrid fungus  
10 *Batrachochytrium dendrobatidis*. *PLoS One*, 7, e35038.  
11 <https://doi.org/10.1371/journal.pone.0035038>
- 12 Genitsaris, S., Moustaka-Gouni, M., & Kormas, K. A. (2011). Airborne microeukaryote  
13 colonists in experimental water containers: diversity, succession, life histories and established  
14 food webs. *Aquatic Microbial Ecology*, 62, 139–152. <https://doi.org/10.3354/ame01463>
- 15 Graham, E. B., Knelman, J. E., Schindlbacher, A., Siciliano, S., Breulmann, M., Yannarell,  
16 A., ... Nemergut, D. R. (2016). Microbes as engines of ecosystem function: When does  
17 community structure enhance predictions of ecosystem processes? *Frontiers in Microbiology*,  
18 7, 214. <https://doi.org/10.3389/fmicb.2016.00214>
- 19 Green, A. J., Figuerola, J., & Sánchez, M. I. (2002). Implications of waterbird ecology for the  
20 dispersal of aquatic organisms. *Acta Oecologica*, 23, 177–189. [https://doi.org/10.1016/S1146-  
21 609X\(02\)01149-9](https://doi.org/10.1016/S1146-609X(02)01149-9)
- 22 Green, A. J., Jenkins, K. M., Bell, D., Morris, P. J., & Kingsford, R. T. (2008). The potential  
23 role of waterbirds in dispersing invertebrates and plants in arid Australia. *Freshwater Biology*,  
24 53, 380–392. <https://doi.org/10.1111/j.1365-2427.2007.01901.x>
- 25 Green, A. J., & Sánchez, M. I. (2006). Passive internal dispersal of insect larvae by migratory  
26 birds. *Biology Letters*, 2, 55–57. <https://doi.org/10.1098/rsbl.2005.0413>
- 27 Guillou, L., Bachar, D., Audic, S., Bass, D., Berney, C., Bittner, L., ... Christen, R. (2013).  
28 The Protist Ribosomal Reference database (PR<sup>2</sup>): a catalog of unicellular eukaryote Small  
29 Sub-Unit rRNA sequences with curated taxonomy. *Nucleic Acids Research*, 41, D597–D604.  
30 <https://doi.org/10.1093/nar/gks1160>
- 31 Gurd, D. B. (2007). Predicting resource partitioning and community organization of filter-  
32 feeding dabbling ducks from functional morphology. *The American Naturalist*, 169, 334–343.  
33 <https://doi.org/10.1086/510924>
- 34 Hartikainen, H., Bass, D., Briscoe, A. G., Knipe, H., Green, A. J., & Okamura, B. (2016).  
35 Assessing myxozoan presence and diversity using environmental DNA. *International Journal*  
36 *for Parasitology*, 46, 781–792. <https://doi.org/10.1016/j.ijpara.2016.07.006>
- 37 Horváth, Z., Vad, C. F., & Ptačnik, R. (2016). Wind dispersal results in a gradient of dispersal  
38 limitation and environmental match among discrete aquatic habitats. *Ecography*, 39, 726–732.  
39 <https://doi.org/10.1111/ecog.01685>

- 1 Horváth, Z., Vad, C. F., Vörös, L., & Boros, E. (2013). The keystone role of anostracans and  
2 copepods in European soda pans during the spring migration of waterbirds. *Freshwater*  
3 *Biology*, 58, 430–440. <https://doi.org/10.1111/fwb.12071>
- 4 Hsieh, T. C., Ma, K. H., & Chao, A. (2020). iNEXT: Interpolation and extrapolation for  
5 species diversity. R package version 2.0.20. <https://CRAN.R-project.org/package=iNEXT>
- 6 Jarma, D., Sánchez, M. I., Green, A. J., Peralta-Sánchez, J. M., Hortas, F., Sánchez-Melsió,  
7 A., & Borrego, C. M. (2021). Faecal microbiota and antibiotic resistance genes in migratory  
8 waterbirds with contrasting habitat use. *Science of The Total Environment*, 783, 146872.  
9 <https://doi.org/10.1016/j.scitotenv.2021.146872>
- 10 Kirschner, A. K. T., Eiler, A., Zechmeister, T. C., Velimirov, B., Herzig, A., Mach, R., &  
11 Farnleitner, A. H. (2002). Extremely productive microbial communities in shallow saline  
12 pools respond immediately to changing meteorological conditions. *Environmental*  
13 *Microbiology*, 4, 546–555. doi:10.1046/j.1462-2920.2002.00334.x
- 14 Kooloos, J. G. M., Kraaijeveld, A. R., Langenbach, G. E. J., & Zweers, G. A. (1989).  
15 Comparative mechanics of filter feeding in *Arias platyrhynchos*, *Anas clypeata* and *Aythya*  
16 *fuligula* (Ayes, Anseriformes). *Zoomorphology*, 108, 269–290.  
17 <https://doi.org/10.1007/BF00312160>
- 18 Kozich, J. J., Westcott, S. L., Baxter, N. T., Highlander, S. K., & Schloss, P. D. (2013).  
19 Development of a dual-index sequencing strategy and curation pipeline for analyzing  
20 amplicon sequence data on the MiSeq Illumina sequencing platform. *Applied and*  
21 *Environmental Microbiology*, 79, 5112–20. <https://doi.org/10.1128/AEM.01043-13>
- 22 Kunin, V., Engelbrekton, A., Ochman, H., & Hugenholtz, P. (2010). Wrinkles in the rare  
23 biosphere: pyrosequencing errors can lead to artificial inflation of diversity estimates.  
24 *Environmental Microbiology*, 12, 118–23. <https://doi.org/10.1111/j.1462-2920.2009.02051.x>
- 25 Kuwae, T., Beninger, P. G., Decottignies, P., Mathot, K. J., Lund, D. R., & Elnor, R. W.  
26 (2008). Biofilm grazing in a higher vertebrate: the western sandpiper, *Calidris mauri*.  
27 *Ecology*, 89, 599–606. <https://doi.org/10.1890/07-1442.1>
- 28 Kuwae, T., Miyoshi, E., Hosokawa, S., Ichimi, K., Hosoya, J., Amano, T., ... Elnor, R.W.  
29 (2012). Variable and complex food web structures revealed by exploring missing trophic links  
30 between birds and biofilm. *Ecology Letters*, 15, 347–356. <https://doi.org/10.1111/j.1461-0248.2012.01744.x>
- 32 Langenheder, S., & Lindström, E. S. (2019). Factors influencing aquatic and terrestrial  
33 bacterial community assembly. *Environmental Microbiology Reports*, 11, 306–315.  
34 <https://doi.org/10.1111/1758-2229.12731>
- 35 Laviad-Shitrit, S., Izhaki, I., Lalar, M., & Halpern, M. (2019). Comparative analysis of  
36 intestine microbiota of four wild waterbird species. *Frontiers in Microbiology*, 10, 1911.  
37 <https://doi.org/10.3389/fmicb.2019.01911>
- 38 Leibold, M. A., & Chase, J. M. (2018). *Metacommunity Ecology. Monographs in population*  
39 *biology* (Vol. 59). Princeton University Press.
- 40 Leibold, M. A., Holyoak, M., Mouquet, N., Amarasekare, P., Chase, J. M., Hoopes, M. F., ...  
41 Gonzalez, A. (2004). The metacommunity concept: a framework for multi-scale community  
42 ecology. *Ecology Letters*, 7, 601–613. <https://doi.org/10.1111/j.1461-0248.2004.00608.x>

- 1 Lewis, L. R., Behling, E., Gousse, H., Qian, E., Elphick, C. S., Lamarre, J., ... Goffinet B.  
2 (2014). First evidence of bryophyte diaspores in the plumage of transequatorial migrant birds.  
3 *PeerJ*, 2, e424. <https://doi.org/10.7717/peerj.424>
- 4 Link, P., Afton, A. D., Cox, R. R., & Davis, B. E. (2011). Daily movements of female  
5 mallards wintering in Southwestern Louisiana. *Waterbirds*, 34, 422–428.  
6 <https://doi.org/10.1675/063.034.0404>
- 7 Lovas-Kiss, Á., Sánchez, M. I., Wilkinson, D. M., Coughlan, N. E., Alves, J. A., & Green, A.  
8 J. (2019). Shorebirds as important vectors for plant dispersal in Europe. *Ecography*, 42, 956–  
9 967. <https://doi.org/10.1111/ecog.04065>
- 10 Lovas-Kiss, Á., Vincze, O., Löki, V., Pallér-Kapusi, F., Halasi-Kovács, B., Kovács, G., ...  
11 Lukács, B. A. (2020). Experimental evidence of dispersal of invasive cyprinid eggs inside  
12 migratory waterfowl. *Proceedings of the National Academy of Sciences*, 117, 15397–15399.  
13 <https://doi.org/10.1073/pnas.2004805117>
- 14 Lovas-Kiss, Á., Vizi, B., Vincze, O., Molnár, V. A., & Green, A. J. (2018). Endozoochory of  
15 aquatic ferns and angiosperms by mallards in Central Europe. *Journal of Ecology*, 106, 1714–  
16 1723. <https://doi.org/10.1111/1365-2745.12913>
- 17 Luef, B., Aspetsberger, F., Hein, T., Huber, F., & Peduzzi, P. (2007). Impact of hydrology on  
18 free-living and particle-associated microorganisms in a river floodplain system (Danube,  
19 Austria). *Freshwater Biology*, 52, 1043–1057. <https://doi.org/10.1111/j.1365-2427.2007.01752.x>
- 21 Mangiafico, S. S. (2021). rcompanion: Functions to support extension education program  
22 evaluation. R package version 2.4.6. <https://CRAN.R-project.org/package=rcompanion>
- 23 Martiny, J., Bohannan, B., Brown, J. H., Colwell, R. K., Fuhrman, J., Green, J., ... Staley, J.  
24 T. (2006). Microbial biogeography: putting microorganisms on the map. *Nature Reviews*  
25 *Microbiology*, 4, 102–112. <https://doi.org/10.1038/nrmicro1341>
- 26 Matsubara, T., Sugimori, F., Iwabuchi, K., & Aoyama, K. (1994). The relation between the  
27 feeding activity of wintering shovelers (*Anas clypeata*) and the horizontal distribution of  
28 zooplankton in Lake Teganuma, Japan. *Hydrobiologia*, 294, 253–261.  
29 <https://doi.org/10.1007/BF00021298>
- 30 McKay, H., Watola, G. V., Langton, S. D., & Langton, S. A. (2006). The use of agricultural  
31 fields by re-established greylag geese (*Anser anser*) in England: A risk assessment. *Crop*  
32 *Protection*, 25, 996–1003. <https://doi.org/10.1016/j.cropro.2006.01.010>
- 33 Middleton, B. A., & van der Valk, A. G. (1987). The food habits of greylag and barheaded  
34 geese in the Keoladeo National Park, India. *Wildfowl*, 38, 94–102.
- 35 Mony, C., Vandenkoornhuysse, P., Bohannan, B. J. M., Peay, K., & Leibold, M. A. (2020). A  
36 landscape of opportunities for microbial ecology research. *Frontiers in Microbiology*, 11,  
37 561427. <https://doi.org/10.3389/fmicb.2020.561427>
- 38 Nilsson, L., & Persson, H. (1992). Feeding areas and local movement patterns of post-  
39 breeding Greylag Geese *Anser anser* in South Sweden. *Ornis Svecica*, 2, 77–90.
- 40 Ogle, D. H., Wheeler, P., & Dinno, A. (2021). FSA: Fisheries stock analysis. R package  
41 version 0.9.1. <https://github.com/droglenc/FSA>



- 1 Okamura, B., Hartikainen, H., & Trew, J. (2019). Waterbird-mediated dispersal and  
2 freshwater biodiversity: General insights from bryozoans. *Frontiers in Ecology and*  
3 *Evolution*, 7, 29. <https://doi.org/10.3389/fevo.2019.00029>
- 4 Oksanen, J., Blanchet, F. G., Friendly, M., Kindt, R., Legendre, P., McGlinn, D., ... Wagner,  
5 H. (2020). vegan: Community ecology package. R package version 2.5-7. [https://CRAN.R-](https://CRAN.R-project.org/package=vegan)  
6 [project.org/package=vegan](https://CRAN.R-project.org/package=vegan)
- 7 Oláh, J. Ifj. (2003). Vízimadár anyagforgalmi guildek. *Magyar Vízivad Közlemények*, 10,  
8 381–423.
- 9 Parada, A. E., Needham, D. M., & Fuhrman, J. A. (2016). Every base matters: Assessing  
10 small subunit rRNA primers for marine microbiomes with mock communities, time series and  
11 global field samples. *Environmental Microbiology*, 18, 1403–1414.  
12 <https://doi.org/10.1111/1462-2920.13023>
- 13 Potts, M. (1999). Mechanisms of desiccation tolerance in cyanobacteria. *European Journal of*  
14 *Phycology*, 34, 319–328. <https://doi.org/10.1080/09670269910001736382>
- 15 Ptacnik, R., Andersen, T., Brettum, P., Lepistö, L., & Willén, E. (2010). Regional species  
16 pools control community saturation in lake phytoplankton. *Proceedings of the Royal Society*  
17 *B: Biological Sciences*, 277, 3755–3764. <https://doi.org/10.1098/rspb.2010.1158>
- 18 Quast, C., Pruesse, E., Yilmaz, P., Gerken, J., Schweer, T., Yarza, P., ... Glöckner, F. O.  
19 (2013). The Silva ribosomal RNA gene database project: improved data processing and web-  
20 based tools. *Nucleic Acids Research*, 41, D590–6. <https://doi.org/10.1093/nar/gks1219>
- 21 R Core Team (2021). R: A language and environment for statistical computing. R Foundation  
22 for Statistical Computing, Vienna, Austria. <https://www.R-project.org/>
- 23 Rainey, F. A., Ray, K., Ferreira, M., Gatz, B. Z., Nobre, M. F., Bagaley, D., ... da Costa, M.  
24 S. (2005). Extensive diversity of ionizing-radiation-resistant bacteria recovered from Sonoran  
25 Desert soil and description of nine new species of the genus *Deinococcus* obtained from a  
26 single soil sample. *Applied and Environmental Microbiology*, 71, 5225–5235.  
27 <https://doi.org/10.1128/AEM.71.9.5225-5235.2005>
- 28 Ray, J. L., Althammer, J., Skaar, K. S., Simonelli, P., Larsen, A., Stoecker, D., ... Troedsson,  
29 C. (2016). Metabarcoding and metabolome analyses of copepod grazing reveal feeding  
30 preference and linkage to metabolite classes in dynamic microbial plankton communities.  
31 *Molecular Ecology*, 25, 5585–5602. <https://doi.org/10.1111/mec.13844>
- 32 Reise, K., Gollasch, S., & Wolff, W. J. (1999). Introduced marine species of the North Sea  
33 coasts. *Helgoländer Meeresuntersuchungen*, 52, 219–234.  
34 <https://doi.org/10.1007/BF02908898>
- 35 Reynolds, C., & Cumming, G. S. (2016). Seed dispersal by waterbirds in southern Africa:  
36 comparing the roles of ectozoochory and endozoochory. *Freshwater Biology*, 61, 349–361.  
37 <https://doi.org/10.1111/fw.12709>
- 38 Rohwer, R. R., Hamilton, J. J., Newton, R. J., & McMahon, K. D. (2018). TaxAss: leveraging  
39 a custom freshwater database achieves fine-scale taxonomic resolution. *mSphere*, 3, e00327–  
40 18. <https://doi.org/10.1128/mSphere.00327-18>

- 1 Ruiz, G., Rawlings, T. K., Dobbs, F. C., Drake, L. A., Mullady, T., Huq, A., & Colwell, R. R.  
2 (2000). Global spread of microorganisms by ships. *Nature*, 40, 49–50.  
3 <https://doi.org/10.1038/35040695>
- 4 Sánchez, M. I., Hortas, F., Figuerola, J., & Green, A. J. (2012). Comparing the potential for  
5 dispersal via waterbirds of a native and an invasive brine shrimp. *Freshwater Biology*, 57,  
6 1896–1903. <https://doi.org/10.1111/j.1365-2427.2012.02852.x>
- 7 Schleper, C., Pihler, G., Kuhlmoorgen, B., & Zillig, W. (1995). Life at extremely low pH.  
8 *Nature*, 375, 741–742. <https://doi.org/10.1038/375741b0>
- 9 Schloss, P. D., Westcott, S. L., Ryabin, T., Hall, J. R., Hartmann, M., Hollister, E. B., ...  
10 Weber, C. F. (2009). Introducing mothur: open-source, platform-independent, community  
11 supported software for describing and comparing microbial communities. *Applied and*  
12 *Environmental Microbiology*, 75, 7537–41. <https://doi.org/10.1128/AEM.01541-09>
- 13 Sharma, N. K., Rai, A. K., Singh, S., & Brown, R. M., Jr. (2007). Airborne algae: their  
14 present status and relevance. *Journal of Phycology*, 43, 615–627.  
15 <https://doi.org/10.1111/j.1529-8817.2007.00373.x>
- 16 Silva, G. G., Green, A. J., Weber, V., Hoffmann, P., Lovas-Kiss, Á., Stenert, C., & Maltchik,  
17 L. (2018). Whole angiosperms *Wolffia columbiana* disperse by gut passage through wildfowl  
18 in South America. *Biology Letters*, 14, 20180703. <https://doi.org/10.1098/rsbl.2018.0703>
- 19 Silva, G. G., Weber, V., Green, A. J., Hoffmann, P., Silva, V. S., Volcan, M., ... Maltchik, L.  
20 (2019). Killifish eggs can disperse via gut passage through waterfowl. *Ecology*, 100, e02774.  
21 <https://doi.org/10.1002/ecy.2774>
- 22 Sinclair, L., Osman, O. A., Bertilsson, S., & Eiler, A. (2015). Microbial community  
23 composition and diversity via 16S rRNA gene amplicons: evaluating the illumina platform.  
24 *PloS One*, 10, e0116955. <https://doi.org/10.1371/journal.pone.0116955>
- 25 Sterbetz, I. (1992). A Balatonon telelő északi vadlúdtömegek exkretumprodukcíója. *Aquila*,  
26 99, 33–40.
- 27 Szabó, A., Korponai, K., Kerepesi, C., Somogyi, B., Vörös, L., Bartha, D., ... Felföldi, T.  
28 (2017). Soda pans of the Pannonian steppe harbor unique bacterial communities adapted to  
29 multiple extreme conditions. *Extremophiles*, 21, 639–649. [https://doi.org/10.1007/s00792-](https://doi.org/10.1007/s00792-30)  
30 017-0932-4
- 31 Szabó, A., Korponai, K., Somogyi, B., Vajna, B., Vörös, L., Horváth, Z., ... Felföldi, T.  
32 (2020). Grazing pressure-induced shift in planktonic bacterial communities with the  
33 dominance of acIII-A1 actinobacterial lineage in soda pans. *Scientific Reports*, 10, 19871.  
34 <https://doi.org/10.1038/s41598-020-76822-8>
- 35 Telford, R. J., Vandvik, V., & Birks, H. J. (2006). Dispersal limitations matter for microbial  
36 morphospecies. *Science*, 312, 1015. <https://doi.org/10.1126/science.1125669>
- 37 Tóth, A., Horváth, Z., Vad, C. F., Zsuga, K., Nagy, S. A., & Boros, E. (2014). Zooplankton of  
38 the European soda pans: Fauna and conservation of a unique habitat type. *International*  
39 *Review of Hydrobiology*, 99, 255–276. <https://doi.org/10.1002/iroh.201301646>
- 40 Valls, L., Castillo-Escrivà, A., Barrera, L., Gómez, E., Gil-Delgado, J. A., Mesquita-Joanes,  
41 F., & Armengol, X. (2017). Differential endozoochory of aquatic invertebrates by two duck

1 species in shallow lakes. *Acta Oecologica*, 80, 39–46.  
2 <https://doi.org/10.1016/j.actao.2017.03.003>

3 van der Gast, C. J. (2015). Microbial biogeography: the end of the ubiquitous dispersal  
4 hypothesis? *Environmental Microbiology*, 17, 544–546. [https://doi.org/10.1111/1462-](https://doi.org/10.1111/1462-2920.12635)  
5 2920.12635

6 Viana, D. S., Santamaría, L., & Figuerola, J. (2016). Migratory birds as global dispersal  
7 vectors. *Trends in Ecology & Evolution*, 31, 763–775.  
8 <https://doi.org/10.1016/j.tree.2016.07.005>

9 Viana, D. S., Santamaría, L., Michot, T. C., & Figuerola, J. (2013a). Allometric scaling of  
10 long-distance seed dispersal by migratory birds. *The American Naturalist*, 181, 649–662.  
11 <https://doi.org/10.1086/670025>

12 Viana, D. S., Santamaría, L., Michot, T. C., & Figuerola, J. (2013b). Migratory strategies of  
13 waterbirds shape the continental-scale dispersal of aquatic organisms. *Ecography*, 36, 430–  
14 438. <https://doi.org/10.1111/j.1600-0587.2012.07588.x>

15 Vyverman, W., Verleyen, E., Sabbe, K., Vanhoutte, K., Sterken, M., Hodgson, D. A., ...  
16 Wever, A. D. (2007). Historical processes constrain patterns in global diatom diversity.  
17 *Ecology*, 88, 1924–1931. <https://doi.org/10.1890/06-1564.1>

18 Wendelin, B., & Dvorak, M. (2020). *Projekt Vogelwarte Madárvárta 2. Angewandte*  
19 *ornithologische Forschung. Teil 1 Graugans-Untersuchungen*. Research Report. BirdLife  
20 Österreich, Wien.

21 Wohl, D. L., Arora, S., & Gladstone, J. R. (2004). Functional redundancy supports  
22 biodiversity and ecosystem function in a closed and constant environment. *Ecology*, 85,  
23 1534–1540. <https://doi.org/10.1890/03-3050>

24 Zinger, L., Boetius, A., & Ramette, A. (2014). Bacterial taxa–area and distance–decay  
25 relationships in marine environments. *Molecular Ecology*, 23, 954–964.  
26 <https://doi.org/10.1111/mec.12640>

27 Zobel, M., Öpik, M., Moora, M., & Pärtel, M. (2006). Biodiversity and ecosystem  
28 functioning: It's time for dispersal experiments. *Journal of Vegetation Science*, 17, 543–547.  
29 <https://doi.org/10.1111/j.1654-1103.2006.tb02477.x>

30

31

32

33

34

35

36

37



1 **Biosketch**

2 Beáta Szabó is a postdoc researcher at Institute of Aquatic Ecology, Centre for Ecological  
3 Research and interested in the processes underlying the formation of biodiversity and  
4 metacommunities of aquatic microorganisms with a special focus on small temporary ponds.

5 **Author contributions**

6 ZH, CFV and RP conceived the ideas; ZH, CFV, EB and DL collected the samples; ZM  
7 performed the lab work; AS and ZM analysed the molecular data; BS and ZH performed the  
8 statistical analyses; BS wrote the manuscript with significant contributions by ZH, AS and  
9 CFV; all authors commented on earlier versions of the manuscript.

10 **Supporting information**

11 Additional supporting information may be found in the online version of the article at the  
12 publisher's website.

13

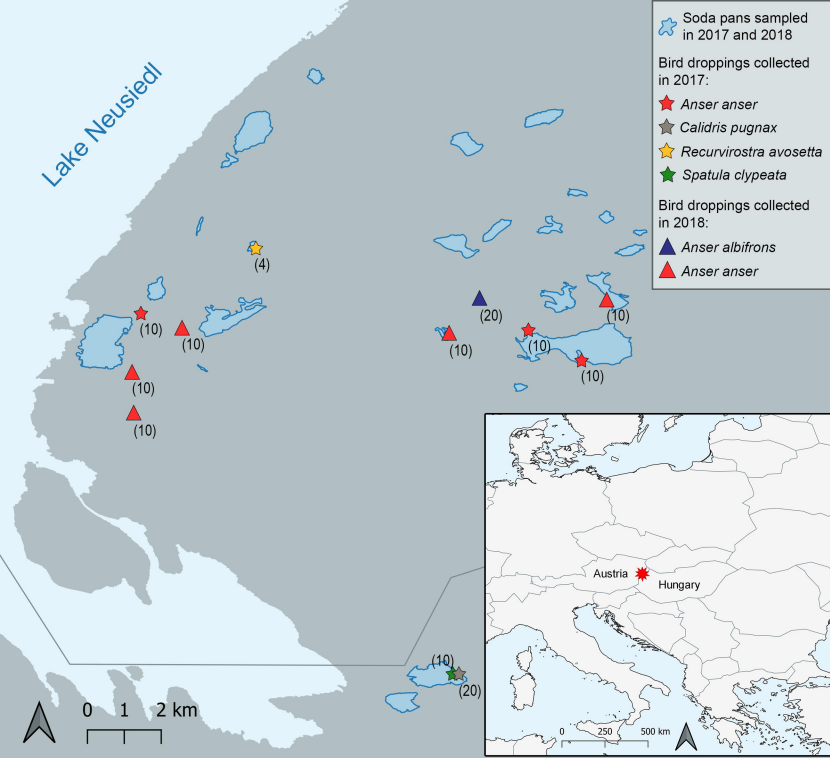

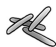

## Prokaryotes

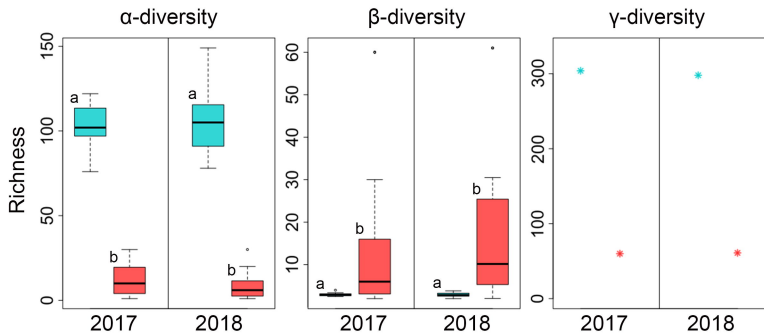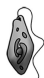

## Microeukaryotes

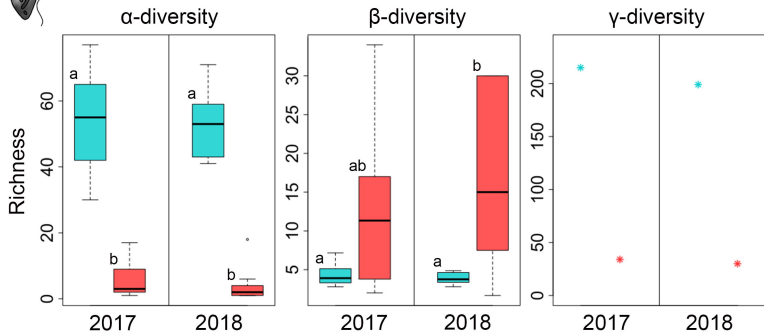

Sample type

■ Aquatic community ■ *Anser anser*

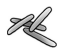

## Prokaryotes

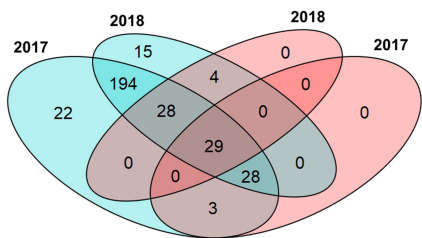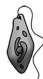

## Microeukaryotes

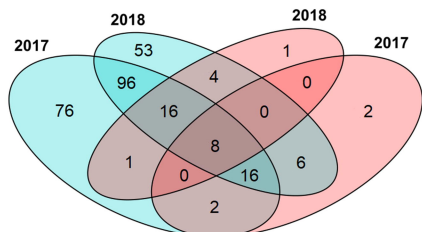

Sample type

■ Aquatic community 
 ■ *Anser anser*

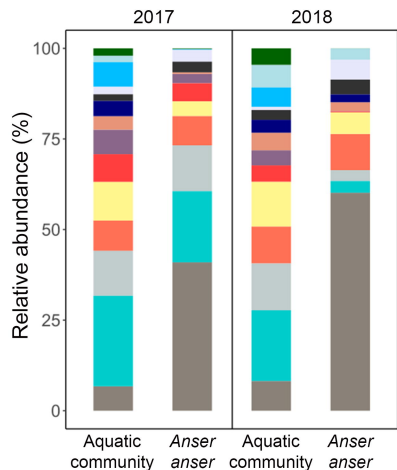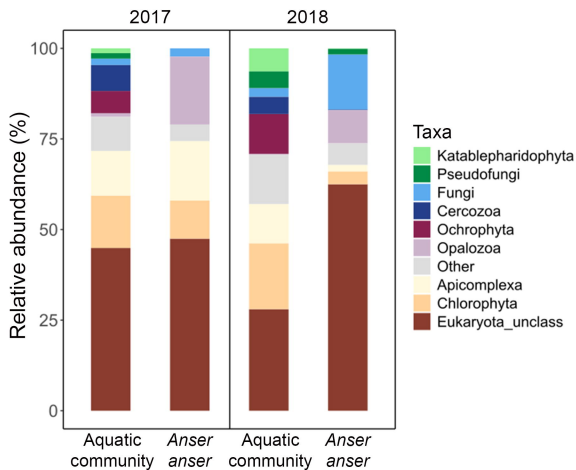



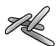

## Prokaryotes

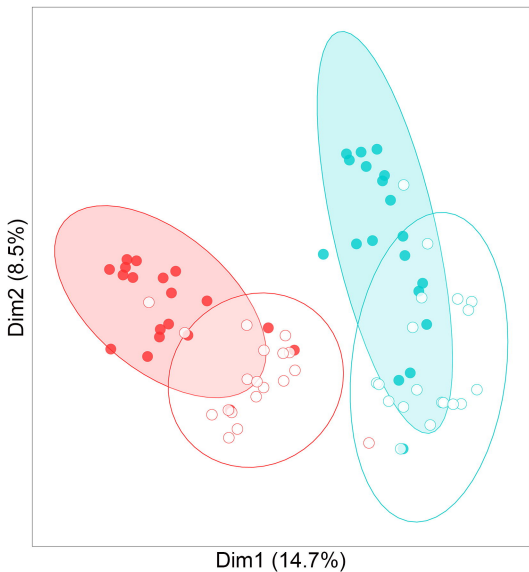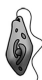

## Microeukaryotes

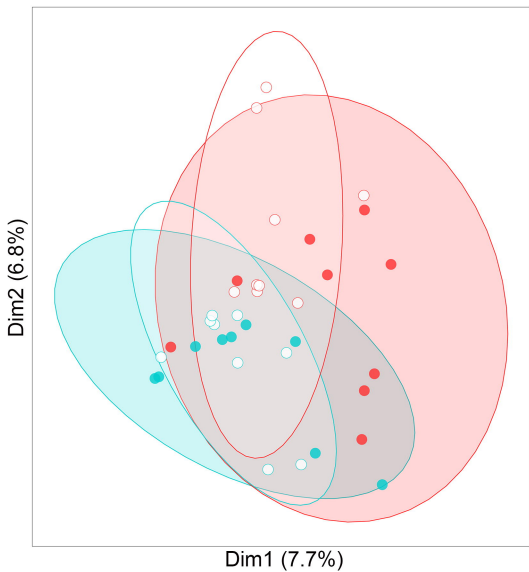

Sample group

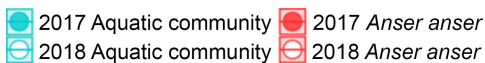

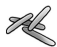

## Prokaryotes

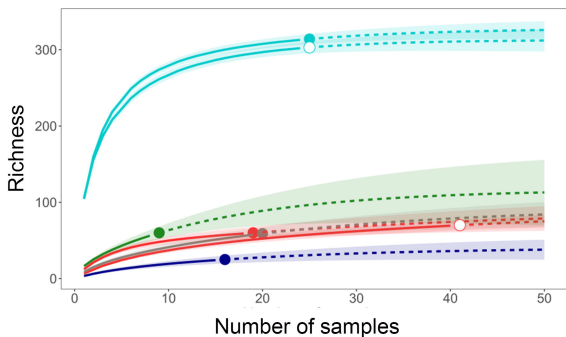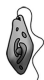

## Microeukaryotes

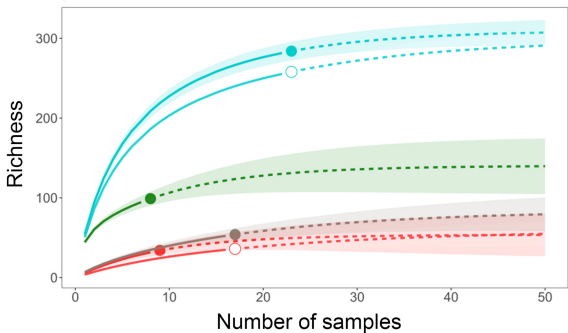

Sample group

- 2017 Aquatic community
- 2018 Aquatic community
- 2017 *Anser anser*
- 2018 *Anser anser*
- 2017 *Calidris pugnax*
- 2017 *Spatula clypeata*
- 2018 *Anser albifrons*
